# Supplementary material for: Design and synthesis of polycyclic sulfones via Diels–Alder reaction and ring-rearrangement metathesis as key steps
Source: publisher site journal article supplement (doi:10.3762/bjoc.11.148), 2015-08-06

**Supporting Information**  
**for**  
**Design and synthesis of polycyclic sulfones via Diels–Alder**  
**reaction and ring-rearrangement metathesis as key steps**

Sambasivarao Kotha\* and Rama Gunta

Address: Department of Chemistry, Indian Institute of Technology-Bombay, Powai, Mumbai,  
India, Fax: 022-25767152

Email: Sambasivarao Kotha\* - srk@chem.iitb.ac.in

\*Corresponding author

**Detailed experimental procedures, characterization data and copies of  $^1\text{H}$ ,  
 $^{13}\text{C}$  NMR and HRMS spectra for all new compounds**

**Contents**

|                                                                                                                                                                                        |            |
|----------------------------------------------------------------------------------------------------------------------------------------------------------------------------------------|------------|
| <b>Experimental procedures and characterization data</b>                                                                                                                               | <b>S2</b>  |
| <b>References</b>                                                                                                                                                                      | <b>S13</b> |
| <b>Copies of <math>^1\text{H}</math>, <math>^{13}\text{C}</math> NMR and HRMS spectra of the compounds 2a–d, 8b–d, 1b,c and 10–<br/>13; DEPT-135 spectra of the selected compounds</b> | <b>S14</b> |

## Experimental procedures and characterization data

### General methods

All the reactions were monitored by employing thin-layer chromatography (TLC) using appropriate mixtures of EtOAc and petroleum ether as mobile phase. Reactions involving oxygen sensitive reagents or catalysts were performed in degassed solvents. Transfer of moisture sensitive materials were carried out using standard syringe–septum techniques and the reactions were maintained under nitrogen or argon atmosphere until work up. Dry dichloromethane ( $\text{CH}_2\text{Cl}_2$ ) and toluene were obtained by distillation over  $\text{P}_2\text{O}_5$ , dry hexamethylphosphoramide (HMPA) was prepared by stirring over  $\text{CaH}_2$  for 1 h followed by vacuum distillation and anhydrous tetrahydrofuran (THF) was obtained by distillation over sodium benzophenone freshly prior to use. Sodium sulfide nonahydrate ( $\text{Na}_2\text{S}\cdot 9\text{H}_2\text{O}$ ) and *n*-BuLi (1.6 M solution in hexane) were purchased from Acros Organics. Potassium hydrogen persulfate ( $\text{KHSO}_5$ ) commercially available as Oxone<sup>®</sup>. The composition of the Oxone<sup>®</sup> is  $2\text{KHSO}_5\cdot\text{KHSO}_4\cdot\text{K}_2\text{SO}_4$ . All the commercial grade reagents were used without further purification.

### Techniques

Melting points were recorded on a Veego melting point apparatus and are uncorrected. Nuclear Magnetic Resonance (NMR) spectra were generally recorded on Bruker (Avance<sup>™</sup> 400 or Avance<sup>™</sup> III 500) spectrometers operated at 400 or 500 MHz for  $^1\text{H}$  and 100.6 or 125.7 MHz for  $^{13}\text{C}$  nuclei. NMR samples were generally made in chloroform-*d* solvent and chemical shifts ( $\delta$  values) were reported in parts per million (ppm) using tetramethylsilane (TMS) as an internal standard. Coupling constants (*J* values) were reported in hertz (Hz). The high-resolution mass spectrometric (HRMS) measurements were carried out using a Bruker (Maxis Impact) or Micromass Q-ToF spectrometer. Infrared (IR) spectra were recorded on a Nicolet Impact-400 FT IR spectrometer.

## Preparation of the sulfide 5

The known sulfide **5** was prepared starting with the anhydride **4** in three steps by following the literature procedure [1] as shown in Scheme S1.

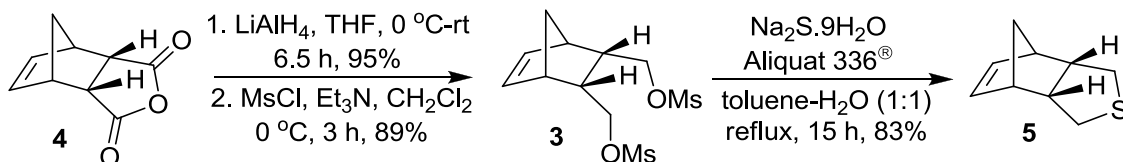

**Scheme S1:** Preparation of the sulfide **5** starting from the anhydride **4**.

## Preparation of the sulfone 6 [2]

To a stirred solution of sulfide **5** (220 mg, 1.44 mmol) in MeOH (8 mL), a solution of Oxone<sup>®</sup> (1.10 g, 3.61 mmol) in water (8 mL) was added at  $-5$  °C. Then, milky white suspension was formed. This suspension was stirred at the same temperature for 6 h. After completion of the reaction, the solvent was removed under reduced pressure. To the resulting residue water (30 mL) was added and extracted with  $\text{CHCl}_3$  ( $3 \times 30$  mL). The combined organic layers were washed with brine ( $2 \times 20$  mL), dried over anhydrous  $\text{Na}_2\text{SO}_4$  and concentrated in vacuo. The crude product was purified by silica gel column chromatography (30% EtOAc–petroleum ether) to furnish the known sulfone **6** (266 mg, 89%) as colourless flakes and a minor amount of epoxy sulfone **7** (23 mg, 8%) as a white solid.

**Sulfone 6:** mp: 126–128 °C (lit. [3] mp: 124–126 °C).

$^1\text{H}$  NMR (500 MHz,  $\text{CDCl}_3$ ):  $\delta$  (ppm) = 6.26 (t,  $J = 2.0$  Hz, 2H),

3.16–3.12 (m, 2H), 3.28 (br s, 2H), 2.96–2.91 (m, 2H), 2.30–2.25 (m,

2H), 1.75 (dt,  $J = 9.0, 2.0$  Hz, 1H), 1.48 (d,  $J = 2.0$  Hz, 1H);  $^{13}\text{C}$  NMR (100.6 MHz,  $\text{CDCl}_3$ ):

$\delta$  (ppm) = 136.9, 53.1, 49.5, 45.1, 39.5; HRMS (ESI, Q-ToF)  $m/z$ : calculated for  $\text{C}_9\text{H}_{12}\text{NaO}_2\text{S}$

$[\text{M}+\text{Na}]^+$  207.0450, found: 207.0449.

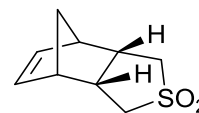

**Epoxy sulfone 7:** mp: 238–240 °C (lit. [4] mp: 241–242 °C).

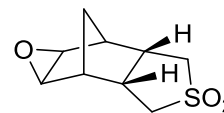

<sup>1</sup>H NMR (400 MHz, CDCl<sub>3</sub>):  $\delta$  (ppm) = 3.28 (br s, 2H), 3.14–3.08

(m, 2H), 2.90–2.83 (m, 4H), 2.73 (br s, 2H), 1.62–1.56 (m, 1H), 0.93 (d,  $J$  = 10.8 Hz, 1H);

<sup>13</sup>C NMR (100.6 MHz, CDCl<sub>3</sub>):  $\delta$  (ppm) = 49.0, 48.9, 38.8, 38.3, 28.0.

### Preparation of the diallyl sulfone 2a

To a stirred solution of sulfone **6** (153 mg, 0.83 mmol) in anhydrous THF (15 mL) was added *n*-BuLi (2.6 mL, 5 equiv) and allyl bromide (0.83 mL, 9.77 mmol) at –58 °C under nitrogen. The resulting reaction mixture was stirred at rt for 26 h. After completion of the reaction (TLC monitoring), the reaction mixture was quenched with water (5 mL) and the solvent was removed in a rotary evaporator in vacuo. The resulting residue was extracted with diethyl ether (3 × 20 mL). The combined organic layers were washed with brine (2 × 20 mL), dried over anhydrous Na<sub>2</sub>SO<sub>4</sub> and concentrated. The crude product was purified by silica gel column chromatography (10% EtOAc–petroleum ether) to get the diallyl sulfone **2a** (176 mg, 80%) as a white crystalline solid and a minor amount of the triallyl sulfone **9** (16 mg, 6%) was obtained as a white solid.

### Conversion of the monoallyl sulfone 8a to the diallyl sulfone 2a

To a stirred solution of monoallyl sulfone **8a** (100 mg, 0.44 mmol) in anhydrous THF (5 mL) was added *n*-BuLi (0.33 mL, 1.2 equiv) and allyl bromide (0.04 mL, 0.49 mmol) at –78 °C under nitrogen. After 2 h, the reaction mixture was allowed to reach the rt and stirred further for 23 h. After completion of the reaction, the reaction mixture was quenched with water (2 mL) and the solvent was evaporated under reduced pressure. The resulting residue was extracted with diethyl ether (3 × 30 mL). The combined organic layers were washed with brine (2 × 10 mL) and dried over anhydrous Na<sub>2</sub>SO<sub>4</sub>. The solvent was removed in vacuo and the crude product was purified by silica gel column chromatography (10% EtOAc–petroleum

ether) to give the desired diallyl sulfone **2a** [80 mg, 88% (based on the starting material, 23 mg recovered)] as a white crystalline solid.

**Monoallyl sulfone 8a** [5]:  $R_f = 0.53$  (20% EtOAc–petroleum ether).

$^1\text{H}$  NMR (400 MHz,  $\text{CDCl}_3$ ):  $\delta$  (ppm) = 6.23 (t,  $J = 1.1$  Hz, 2H),

5.90–5.79 (m, 1H), 5.24 (dq,  $J = 17.0, 1.5$  Hz, 1H), 5.17 (dq,  $J = 10.0,$

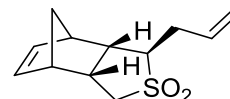

1.2 Hz, 1H), 3.19 (dd,  $J = 13.4, 8.4$  Hz, 1H), 3.17 (d,  $J = 1.4$  Hz, 2H), 2.83–2.69 (m, 2H),

2.49–2.38 (m, 2H), 2.34–2.25 (m, 2H), 1.72 (dt,  $J = 8.8, 1.9$  Hz, 1H), 1.44 (dd,  $J = 8.8, 1.3$  Hz,

1H);  $^{13}\text{C}$  NMR (125.7 MHz,  $\text{CDCl}_3$ ):  $\delta$  (ppm) = 137.1, 136.6, 133.4, 118.5, 62.4, 52.9, 49.7,

46.6, 45.4, 45.2, 37.8, 30.5; HRMS (ESI, Q-ToF)  $m/z$ : calculated for  $\text{C}_{12}\text{H}_{16}\text{NaO}_2\text{S}$   $[\text{M}+\text{Na}]^+$

247.0763, found: 247.0764.

**Diallyl sulfone 2a** [6]:  $R_f = 0.91$  (20% EtOAc–petroleum ether); mp: 75–

76 °C.

$^1\text{H}$  NMR (500 MHz,  $\text{CDCl}_3$ ):  $\delta$  (ppm) = 6.20 (br s, 2H), 5.88–5.80 (m,

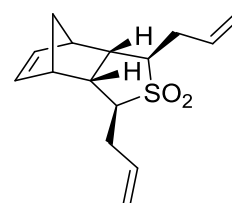

2H), 5.23 (dd,  $J = 16.9, 1.2$  Hz, 2H), 5.16 (d,  $J = 10.0$  Hz, 2H), 2.99 (br

s, 2H), 2.77–2.72 (m, 2H), 2.45–2.40 (m, 2H), 2.37–2.30 (m, 4H), 1.67 (d,  $J = 8.8$  Hz, 1H),

1.39 (d,  $J = 8.8$  Hz, 1H);  $^{13}\text{C}$  NMR (125.7 MHz,  $\text{CDCl}_3$ ):  $\delta$  (ppm) = 136.9, 133.6, 118.6, 62.5,

49.8, 45.6, 45.3, 30.8; HRMS (ESI, Q-ToF)  $m/z$ : calculated for  $\text{C}_{15}\text{H}_{20}\text{NaO}_2\text{S}$   $[\text{M}+\text{Na}]^+$

287.1076, found: 287.1077; IR (neat):  $\nu_{\text{max}} = 3021, 2978, 1640, 1443, 1306, 1216, 1123$   $\text{cm}^{-1}$ .

**Triallyl sulfone 9**:  $R_f = 0.99$  (20% EtOAc–petroleum ether); mp: 75–

77 °C.

$^1\text{H}$  NMR (400 MHz,  $\text{CDCl}_3$ ):  $\delta$  (ppm) = 6.23 (dd,  $J = 5.7, 2.8$  Hz, 1H),

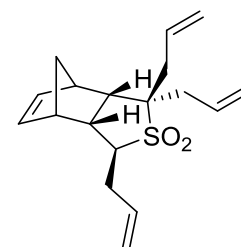

6.10–6.00 (m, 2H), 5.90–5.80 (m, 2H), 5.26–5.13 (m, 6H), 3.00 (br s,

2H), 2.76–2.68 (m, 2H), 2.62–2.41 (m, 6H), 2.12 (dd,  $J = 15.4, 8.0$  Hz,

1H), 1.66 (dt,  $J = 8.6, 1.8$  Hz, 1H), 1.41 (d,  $J = 8.6$  Hz, 1H);  $^{13}\text{C}$  NMR (125.7 MHz,  $\text{CDCl}_3$ ):

$\delta$  (ppm) = 137.9, 135.1, 133.7, 132.7, 131.6, 120.2, 119.5, 118.5, 65.0, 59.7, 52.0, 50.3, 46.6,

45.3, 45.1, 38.1, 36.1, 30.7; HRMS (ESI, Q-ToF)  $m/z$ : calculated for  $C_{18}H_{24}NaO_2S$   $[M+Na]^+$  327.1389, found: 327.1387; IR (neat):  $\nu_{max} = 3082, 2978, 1637, 1437, 1305, 1123\text{ cm}^{-1}$ .

### Synthesis of the butenyl sulfones **8b** and **2b**

To a solution of sulfone **6** (200 mg, 1.08 mmol) in anhydrous THF (15 mL), was added *n*-BuLi (1.60 mL, 2.4 equiv) at  $-74\text{ }^\circ\text{C}$  and stirred for 40 min. Next, dry HMPA (0.38 mL, 2.17 mmol) followed by 4-bromo-1-butene (0.33 mL, 3.26 mmol) were added and the stirring was continued at the same temperature for 1 h. Later, the reaction mixture was allowed to attain the rt and stirred for another 19 h. After completion of the reaction, the reaction mixture was quenched with water (2 mL) and concentrated under reduced pressure. The resulting residue was extracted with diethyl ether ( $3 \times 20\text{ mL}$ ). The combined organic layers were washed with brine ( $2 \times 15\text{ mL}$ ), dried over anhydrous  $Na_2SO_4$  and concentrated. Subsequently, the crude product was purified on silica gel column chromatography (8% EtOAc–petroleum ether) to obtain the dibutenyl sulfone **2b** [43 mg, 21% (based on the starting material, 72 mg recovered)] as a colourless liquid and the monobutenyl sulfone **8b** [125 mg, 75% (based on the starting material, 72 mg recovered)] was delivered by eluting the column with 14% EtOAc–petroleum ether as a yellow liquid.

**Monobutenyl sulfone 8b:**  $R_f = 0.36$  (20% EtOAc–petroleum ether).

$^1\text{H}$  NMR (500 MHz,  $CDCl_3$ ):  $\delta$  (ppm) = 6.23 (t,  $J = 1.8\text{ Hz}$ , 2H), 5.83–5.75 (m, 1H), 5.11 (dq,  $J = 17.1, 1.5\text{ Hz}$ , 1H), 5.06 (dd,  $J = 10.2, 1.4\text{ Hz}$ , 1H), 3.18 (dd,  $J = 13.4, 8.4\text{ Hz}$ , 1H), 3.02 (m, 2H), 2.83–2.76 (m, 1H), 2.44 (td,  $J = 10.0, 3.6\text{ Hz}$ , 1H), 2.38–2.26 (m, 4H), 2.12–2.05 (m, 1H), 1.83–1.76 (m, 1H), 1.73 (dt,  $J = 8.8, 1.8\text{ Hz}$ , 1H), 1.45 (d,  $J = 8.8\text{ Hz}$ , 1H);  $^{13}\text{C}$  NMR (125.7 MHz,  $CDCl_3$ ):  $\delta$  (ppm) = 137.2, 137.0, 136.6, 116.3, 62.0, 53.1, 49.7, 47.0, 45.5, 45.2, 37.9, 30.8, 25.5; HRMS (ESI, Q-ToF)  $m/z$ : calculated for  $C_{13}H_{18}NaO_2S$   $[M+Na]^+$  261.0920, found: 261.0921; IR (neat):  $\nu_{max} = 3058, 2969, 1641, 1444, 1303, 1138, 914\text{ cm}^{-1}$ .

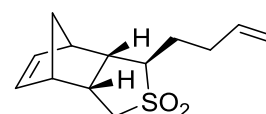

**Dibutenyl sulfone 2b:**  $R_f = 0.64$  (20% EtOAc–petroleum ether).

$^1\text{H}$  NMR (400 MHz,  $\text{CDCl}_3$ ):  $\delta$  (ppm) = 6.19 (t,  $J = 1.8$  Hz, 2H), 5.84–5.73 (m, 2H), 5.13–5.04 (m, 4H), 3.01 (br s, 2H), 2.37–2.25 (m, 8H), 2.14–2.07 (m, 2H), 1.83–1.76 (m, 2H), 1.69 (dt,  $J = 3.6, 1.8$  Hz, 1H),

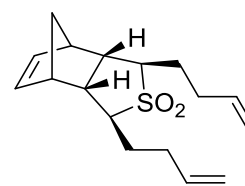

1.40 (d,  $J = 8.8$  Hz, 1H);  $^{13}\text{C}$  NMR (125.7 MHz,  $\text{CDCl}_3$ ):  $\delta$  (ppm) = 137.1, 136.9, 116.3, 62.1, 49.8, 45.5, 45.5, 30.9, 25.7; HRMS (ESI, Q-ToF)  $m/z$ : calculated for  $\text{C}_{17}\text{H}_{24}\text{NaO}_2\text{S}$  [ $\text{M}+\text{Na}$ ]<sup>+</sup> 315.1389, found: 315.1389; IR (neat):  $\nu_{\text{max}} = 3068, 2976, 1642, 1453, 1298, 1134, 915$   $\text{cm}^{-1}$ .

### Synthesis of the pentenyl sulfones 8c and 2c

To a solution of sulfone **6** (200 mg, 1.08 mmol) in anhydrous THF (8 mL), was added *n*-BuLi (1.50 mL, 2.2 equiv) and dry HMPA (0.38 mL, 2.17 mmol) followed by 5-bromo-1-pentene (0.32 mL, 2.71 mmol) at  $-78$  °C. The resulting reaction mixture was stirred at the same temperature for 2 h. Next, the reaction mixture was stirred at rt for 17.5 h. After completion of the reaction, the reaction mixture was quenched with water (2 mL) concentrated in vacuo. The subsequent residue was extracted with diethyl ether ( $3 \times 20$  mL), combined organic layers were washed with brine ( $2 \times 15$  mL) and dried over anhydrous  $\text{Na}_2\text{SO}_4$ . Evaporation of the solvent under reduced pressure gave the crude product which was subjected to silica gel column chromatography (9% EtOAc–petroleum ether) to give the dipentenyl sulfone **2c** (200 mg, 57%) as a colourless liquid. Further elution of the column with 12% EtOAc–petroleum ether, the monopentenyl sulfone **8c** (13 mg, 5%) was obtained as a pale yellow liquid.

**Monopentenyl sulfone 8c:**  $R_f = 0.33$  (20% EtOAc–petroleum ether).

$^1\text{H}$  NMR (400 MHz,  $\text{CDCl}_3$ ):  $\delta$  (ppm) = 6.27–6.23 (m, 2H), 5.85–5.74 (m, 1H), 5.07–4.98 (m, 2H), 3.18 (dd,  $J = 13.3, 8.4$  Hz, 1H),

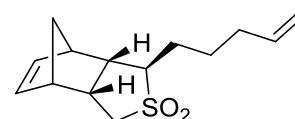

3.01 (d,  $J = 1.2$  Hz, 2H), 2.78 (qd,  $J = 10.0, 3.1$  Hz, 1H), 2.78 (td,  $J = 10.0, 3.6$  Hz, 1H), 2.31–2.23 (m, 2H), 2.17–2.09 (m, 2H), 2.00–1.92 (m, 2H), 1.76–1.56 (m, 3H), 1.44 (d,  $J = 8.8$  Hz, 1H);  $^{13}\text{C}$  NMR (125.7 MHz,  $\text{CDCl}_3$ ):  $\delta$  (ppm) = 137.9, 137.1, 136.8, 115.6, 62.8, 53.1, 49.8,

47.0, 45.6, 45.2, 37.9, 33.8, 26.3, 25.8; HRMS (ESI, Q-ToF)  $m/z$ : calculated for  $C_{14}H_{20}NaO_2S$   $[M+Na]^+$  275.1076, found: 275.1076; IR (neat):  $\nu_{max} = 3058, 2936, 1641, 1456, 1299, 1137, 914\text{ cm}^{-1}$ .

**Dipentenyl sulfone 2c:**  $R_f = 0.63$  (20% EtOAc–petroleum ether).

$^1H$  NMR (500 MHz,  $CDCl_3$ ):  $\delta$  (ppm) = 6.23 (t,  $J = 1.8$  Hz, 2H),

5.84–5.76 (m, 2H), 5.04 (dq,  $J = 17.1, 1.5$  Hz, 2H), 5.00–4.98 (m,

2H), 3.00 (s, 2H), 2.33–2.26 (m, 4H), 2.12 (q,  $J = 7.4$  Hz, 4H),

2.00–1.94 (m, 2H), 1.74–1.68 (m, 3H), 1.66–1.60 (m, 4H), 1.41 (d,  $J = 8.7$  Hz, 1H);  $^{13}C$

NMR (125.7 MHz,  $CDCl_3$ ):  $\delta$  (ppm) = 137.9, 136.9, 115.5, 62.9, 49.9, 45.6, 45.6, 33.8, 26.4,

26.0; HRMS (ESI, Q-ToF)  $m/z$ : calculated for  $C_{19}H_{28}NaO_2S$   $[M+Na]^+$  343.1702, found:

343.1702; IR (neat):  $\nu_{max} = 3075, 2937, 1640, 1458, 1295, 1133, 912\text{ cm}^{-1}$ .

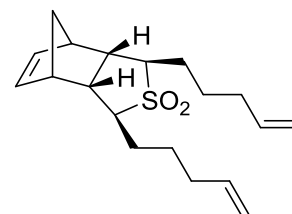

### Synthesis of the hexenyl sulfones **8d** and **2d**

To a solution of sulfone **6** (500 mg, 2.71 mmol) in anhydrous THF (25 mL), was added  $n$ -BuLi (4.10 mL, 2.4 equiv) and dry HMPA (0.94 mL, 5.43 mmol) followed by 6-bromo-1-hexene (1.01 mL, 7.60 mmol) at  $-78\text{ }^\circ\text{C}$  under nitrogen. The resulting reaction mixture was stirred at the same temperature for 2 h. Next, the stirring was continued at rt for 15 h. After completion of the reaction, the reaction mixture was quenched with water (5 mL) and the solvent was removed under reduced pressure. The residue was extracted with diethyl ether ( $3 \times 30$  mL), the combined organic layers were washed with brine ( $2 \times 20$  mL) and dried over anhydrous  $Na_2SO_4$ . The solvent was evaporated in vacuo and purification of the crude product on silica gel column chromatography (7% EtOAc–petroleum ether) provided the dihexenyl sulfone **2d** (706 mg, 75%) as a colourless liquid and further elution with 10% EtOAc–petroleum ether gave the monohexenyl sulfone **8d** (64 mg, 9%) as a pale yellow liquid.



**Monohexenyl sulfone 8d:**  $R_f = 0.49$  (20% EtOAc–petroleum ether).

$^1\text{H}$  NMR (500 MHz,  $\text{CDCl}_3$ ):  $\delta$  (ppm) = 6.26–6.23 (m, 2H),

5.84–5.76 (m, 1H), 5.01 (dq,  $J = 17.1, 1.6$  Hz, 1H), 4.98–4.95

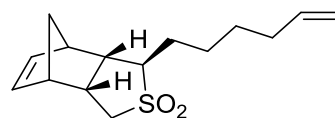

(m, 1H), 3.17 (dd,  $J = 13.3, 8.4$  Hz, 1H), 3.01 (br s, 2H), 2.80–2.75 (m, 1H), 2.43 (td,  $J = 10.0,$

3.5 Hz, 1H), 2.30–2.23 (m, 2H), 2.11–2.06 (m, 2H), 1.99–1.92 (m, 1H), 1.74–1.66 (m, 2H),

1.57–1.41 (m, 5H);  $^{13}\text{C}$  NMR (100.6 MHz,  $\text{CDCl}_3$ ):  $\delta$  (ppm) = 138.6, 137.1, 136.7, 114.9,

62.9, 53.1, 49.8, 47.0, 45.6, 45.2, 37.9, 33.5, 28.9, 26.5, 26.2; HRMS (ESI, Q-ToF)  $m/z$ :

calculated for  $\text{C}_{15}\text{H}_{22}\text{NaO}_2\text{S}$   $[\text{M}+\text{Na}]^+$  289.1233, found: 289.1234; IR (neat):  $\nu_{\text{max}} = 3063,$

2935, 1640, 1456, 1300, 1216, 1138, 912  $\text{cm}^{-1}$ .

**Dihexenyl sulfone 2d:**  $R_f = 0.86$  (20% EtOAc–petroleum ether).

$^1\text{H}$  NMR (500 MHz,  $\text{CDCl}_3$ ):  $\delta$  (ppm) = 6.23 (t,  $J = 1.8$  Hz, 2H),

5.84–5.76 (m, 2H), 5.02 (dq,  $J = 17.1, 1.6$  Hz, 2H), 4.98–4.95 (m,

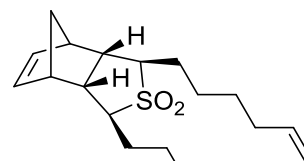

2H), 3.00 (br s, 2H), 2.32–2.23 (m, 4H), 2.11–2.06 (m, 4H), 2.00–

1.93 (m, 2H), 1.73–1.66 (m, 3H), 1.58–1.49 (m, 4H), 1.48–1.41

(m, 5H);  $^{13}\text{C}$  NMR (125.7 MHz,  $\text{CDCl}_3$ ):  $\delta$  (ppm) = 138.6, 136.9, 114.9, 62.9, 49.9, 45.6,

45.6, 33.5, 28.9, 26.6, 26.3; HRMS (ESI, Q-ToF)  $m/z$ : calculated for  $\text{C}_{21}\text{H}_{32}\text{NaO}_2\text{S}$   $[\text{M}+\text{Na}]^+$

371.2015, found: 371.2014; IR (neat):  $\nu_{\text{max}} = 3076, 2935, 1640, 1458, 1296, 1133, 911$   $\text{cm}^{-1}$ .

### Synthesis of the tricyclic sulfone 10

A solution of diallyl sulfone **2a** (150 mg, 0.57 mmol) in dry  $\text{CH}_2\text{Cl}_2$  (40 mL) was degassed with nitrogen for 5 min and purged with ethylene for another 10 min. Next, Grubbs 1<sup>st</sup> generation catalyst (46.70 mg, 10 mol%)

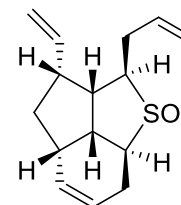

was added at rt in the presence of ethylene gas and the resulting reaction mixture was refluxed for 5 h. After completion of the reaction, the solvent was removed and the crude product was purified by silica gel column chromatography (12% EtOAc–petroleum ether) to get the tricyclic sulfone **10** (72 mg, 48%) as a white solid.

$R_f = 0.45$  (20% EtOAc–petroleum ether); mp: 67–69 °C.

$^1\text{H}$  NMR (500 MHz,  $\text{CDCl}_3$ ):  $\delta$  (ppm) = 5.89–5.72 (m, 4H), 5.21–5.07 (m, 4H), 3.16, 3.13 (ABq,  $J_{\text{AB}} = 7.1$  Hz, 1H), 3.06–2.99 (m, 1H), 2.77–2.67 (m, 3H), 2.59–2.54 (m, 1H), 2.49–2.43 (m, 2H), 2.40–2.32 (m, 2H), 2.16–2.11 (m, 1H), 1.47, 1.42 (ABq,  $J_{\text{AB}} = 12.0$  Hz, 1H);  $^{13}\text{C}$  NMR (125.7 MHz,  $\text{CDCl}_3$ ):  $\delta$  (ppm) = 137.7 (d), 133.7 (d), 129.7 (d), 125.6 (d), 118.5 (t), 117.3 (t), 60.6 (d), 57.3 (d), 46.0 (d), 44.5 (d), 44.1 (d), 40.5 (d), 36.6 (t), 32.7 (t), 22.6 (t); HRMS (ESI, Q-ToF)  $m/z$ : calculated for  $\text{C}_{15}\text{H}_{20}\text{NaO}_2\text{S}$   $[\text{M}+\text{Na}]^+$  287.1076, found: 287.1075; IR (neat):  $\nu_{\text{max}} = 3077, 2930, 1639, 1439, 1280, 1137, 918$   $\text{cm}^{-1}$ .

### Synthesis of the tetracyclic sulfone **1b**

A solution of dibutenylated sulfone **2b** (25 mg, 0.08 mmol) in dry toluene (25 mL) was degassed with nitrogen for 10 min and purged with ethylene gas for another 10 min. Subsequently, G-II catalyst (7.26 mg,

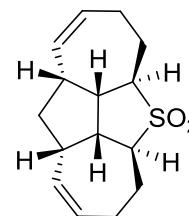

10 mol%) was added in the presence of ethylene gas and the resulting reaction mixture was refluxed for 4 h. After completion of the reaction, the solvent was removed and the crude product was purified by silica gel column chromatography (15% EtOAc–petroleum ether) to obtain the desired tetracyclic sulfone **1b** (22 mg, 97%) as a white solid.

$R_f = 0.15$  (10% EtOAc–petroleum ether); mp: 198–200 °C.

$^1\text{H}$  NMR (500 MHz,  $\text{CDCl}_3$ ):  $\delta$  (ppm) = 5.62–5.56 (m, 2H), 5.42 (dt,  $J = 10.9, 2.0$  Hz, 2H), 3.15–3.10 (m, 2H), 3.00–2.94 (m, 2H), 2.85–2.78 (m, 2H), 2.39–2.30 (m, 2H), 2.16–1.96 (m, 7H), 1.42, 1.36 (ABq,  $J_{\text{AB}} = 13.0$  Hz, 1H);  $^{13}\text{C}$  NMR (125.7 MHz,  $\text{CDCl}_3$ ):  $\delta$  (ppm) = 130.7 (d), 126.0 (d), 58.8 (d), 42.6 (d), 41.7 (d), 38.0 (t), 22.9 (t), 20.3 (t); HRMS (ESI, Q-ToF)  $m/z$ : calculated for  $\text{C}_{15}\text{H}_{20}\text{NaO}_2\text{S}$   $[\text{M}+\text{Na}]^+$  287.1076, found: 287.1078; IR (neat):  $\nu_{\text{max}} = 3017, 2951, 2868, 1637, 1463, 1307, 1273, 1126$   $\text{cm}^{-1}$ .

## Synthesis of the compounds **11**, **1c** and **12**

A solution of dipentenylated sulfone **2c** (30 mg, 0.09 mmol) in dry toluene (30 mL) was degassed with nitrogen for 10 min and purged with ethylene gas for another 10 min. Next, Grubbs 2<sup>nd</sup> generation (G-II) catalyst (7.95 mg, 10 mol%) was added in the presence of ethylene gas and the resulting reaction mixture was refluxed for 9.5 h. After completion of the reaction, the solvent was evaporated and the crude product was purified by silica gel column chromatography (6% EtOAc-petroleum ether) to get the tricyclic sulfone **11** (18 mg, 60%) as a white solid. Continued elution of the column with 10% EtOAc-petroleum ether furnished the desired tetracyclic sulfone **1c** (8.70 mg, 32%) as a white solid. Also, a minor amount of the ring-opened product **12** (2 mg, 6%) was isolated as a white solid.

**Tricyclic sulfone 11:**  $R_f = 0.32$  (10% EtOAc-petroleum ether); mp: 81–83 °C.

<sup>1</sup>H NMR (500 MHz, CDCl<sub>3</sub>):  $\delta$  (ppm) = 5.81–5.72 (m, 2H), 5.68–5.62 (m, 1H), 5.36 (dd,  $J = 10.7, 3.1$  Hz, 1H), 5.14–5.09 (m, 2H), 5.01 (dd,  $J = 17.1, 1.4$  Hz, 1H), 4.96 (d,  $J = 10.1$  Hz, 1H), 3.12–3.06 (m, 2H), 2.81–2.75 (m, 2H), 2.71–2.67 (m, 1H), 2.54–2.48 (m, 1H), 2.36 (d,  $J = 14.1$  Hz, 1H), 2.18–2.12 (m, 1H), 2.08–1.95 (m, 5H), 1.92–1.86 (m, 1H), 1.81–1.73 (m, 2H), 1.64–1.50 (m, 3H), 1.42–1.33 (m, 1H); <sup>13</sup>C NMR (100.6 MHz, CDCl<sub>3</sub>):  $\delta$  (ppm) = 138.2 (d), 137.3 (d), 133.2 (d), 130.7 (d), 116.8 (t), 115.2 (t), 59.4 (d), 59.1 (d), 49.9 (d), 48.3 (d), 46.2 (d), 39.8 (d), 38.3 (t), 33.7 (t), 28.4 (t), 27.3 (t), 26.9 (t), 25.9 (t), 24.5 (t); HRMS (ESI, Q-ToF)  $m/z$ : calculated for C<sub>19</sub>H<sub>28</sub>NaO<sub>2</sub>S [M+Na]<sup>+</sup> 343.1702, found: 343.1703; IR (neat):  $\nu_{\max} = 3072, 2925, 1640, 1458, 1282, 1128, 909$  cm<sup>-1</sup>.

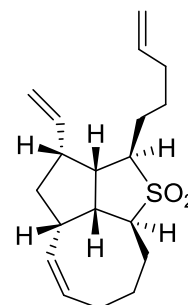

**Tetracyclic sulfone 1c:**  $R_f = 0.13$  (10% EtOAc-petroleum ether); mp: 128–130 °C.

<sup>1</sup>H NMR (500 MHz, CDCl<sub>3</sub>):  $\delta$  (ppm) = 5.71–5.65 (m, 2H), 5.42 (dd,  $J = 10.8, 4.8$  Hz, 2H), 3.22 (br s, 2H), 3.03 (t,  $J = 8.7$  Hz, 2H), 2.85–2.81 (m,

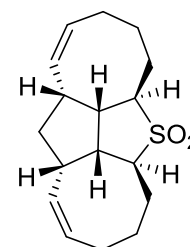

2H), 2.32–2.29 (m, 2H), 2.25–2.20 (m, 1H), 2.17–2.07 (m, 5H), 1.99–1.94 (m, 3H), 1.75–1.61 (m, 3H);  $^{13}\text{C}$  NMR (125.7 MHz,  $\text{CDCl}_3$ ):  $\delta$  (ppm) = 133.3 (d), 131.0 (d), 59.3 (d), 50.6 (d), 40.0 (t), 39.9 (d), 27.6 (t), 27.1 (t), 24.5 (t); HRMS (ESI, Q-ToF)  $m/z$ : calculated for  $\text{C}_{17}\text{H}_{24}\text{NaO}_2\text{S}$   $[\text{M}+\text{Na}]^+$  315.1389, found: 315.1390; IR (neat):  $\nu_{\text{max}}$  = 3015, 2933, 2863, 1454, 1439, 1292, 1128  $\text{cm}^{-1}$

**Ring-opened compound 12:**  $R_f$  = 0.37 (10% EtOAc–petroleum ether); mp: 126–128  $^\circ\text{C}$ .

$^1\text{H}$  NMR (500 MHz,  $\text{CDCl}_3$ ):  $\delta$  (ppm) = 5.82–5.74 (m, 4H), 5.17–5.13 (m, 4H), 5.01 (d,  $J$  = 17.1 Hz, 2H), 4.96 (d,  $J$  = 10.1 Hz, 2H),

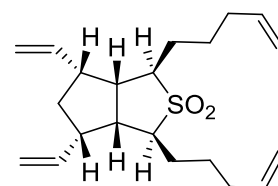

2.82–2.79 (m, 4H), 2.45–2.40 (m, 2H), 2.07 (q,  $J$  = 6.9 Hz, 4H), 1.94–1.86 (m, 2H), 1.84–1.75 (m, 3H), 1.71–1.61 (m, 5H);  $^{13}\text{C}$  NMR (125.7 MHz,  $\text{CDCl}_3$ ):  $\delta$  (ppm) = 138.2 (d), 136.4 (d), 117.1 (t), 115.2 (t), 60.1 (d), 46.2 (d), 45.8 (d), 34.1 (t), 33.6 (t), 27.6 (t), 25.9 (t); HRMS (ESI, Q-ToF)  $m/z$ : calculated for  $\text{C}_{21}\text{H}_{32}\text{NaO}_2\text{S}$   $[\text{M}+\text{Na}]^+$  371.2015, found: 371.2014; IR (neat):  $\nu_{\text{max}}$  = 3074, 2922, 2858, 1640, 1457, 1281, 1126, 912  $\text{cm}^{-1}$ .

### Synthesis of the compound 13

A solution of the dihexenyl sulfone **2d** (21 mg, 0.06 mmol) in dry toluene (25 mL) was degassed with nitrogen for 15 min and purged with ethylene for another 5 min. Subsequently, G-II

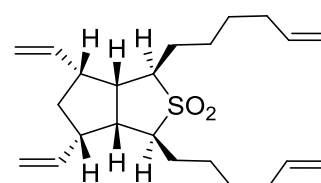

catalyst (5.11 mg, 10 mol%) was added at rt in the presence of ethylene gas then, the resulting reaction mixture was heated to reflux for 19 h. After completion of the reaction, the solvent was removed in vacuo and the crude product was purified by silica gel column chromatography (4% EtOAc–petroleum ether) to deliver the ring-opened compound **13** (19 mg, 88%) as a white solid.  $R_f$  = 0.66 (8% EtOAc–petroleum ether).

$^1\text{H}$  NMR (500 MHz,  $\text{CDCl}_3$ ):  $\delta$  (ppm) = 5.83–5.75 (m, 4H), 5.17–5.14 (m, 4H), 4.99 (dd,  $J$  = 17.1, 1.7 Hz, 2H), 4.94 (d,  $J$  = 10.1 Hz, 2H), 2.82–2.77 (m, 4H), 2.43 (m, 2H), 2.18 (s, 2H),

2.04 (q,  $J = 6.8$  Hz, 5H), 1.94–1.88 (m, 2H), 1.80–1.75 (m, 1H), 1.70–1.60 (m, 2H), 1.50–1.37 (m, 6H);  $^{13}\text{C}$  NMR (100.6 MHz,  $\text{CDCl}_3$ ):  $\delta$  (ppm) = 138.6, 136.2, 116.9, 114.5, 59.9, 46.0, 45.6, 33.9, 33.4, 28.7, 27.9, 26.1; HRMS (ESI, Q-ToF)  $m/z$ : calculated for  $\text{C}_{23}\text{H}_{36}\text{NaO}_2\text{S} [\text{M}+\text{Na}]^+$  399.2328, found: 399.2327; IR (neat):  $\nu_{\text{max}} = 2925, 1457, 1296, 1132$   $\text{cm}^{-1}$ .

## References

1. Zhang, M. J.; Flynn, D. L.; Hanson, P. R. *J. Org. Chem.* **2007**, *72*, 3194–3198.  
doi: 10.1021/Jo0620260
2. Bloch, R.; Abecassis, J. *Tetrahedron Lett.* **1982**, *23*, 3277–3280.  
doi: 10.1016/S0040-4039(00)87591-7
3. Aitken, R. A.; Cadogan, J. I. G.; Gosney, I.; Newlands, S. F. *J. Chem. Soc., Perkin Trans. I* **1994**, 2301–2308. doi: 10.1039/P19940002301
4. Bloch, R.; Abecassis, J.; Hassan, D. *J. Org. Chem.* **1985**, *50*, 1544–1545.  
doi: 10.1021/Jo00209a040
5. Bloch, R.; Abecassis, J.; Hassan, D. *Can. J. Chem.* **1984**, *62*, 2019–2024.  
doi: 10.1139/V84-345
6. Kotha, S.; Gunta, R. *Acta Cryst.* **2014**, *E70*, o1163–o1164.  
doi: 10.1107/S1600536814022053

$^1\text{H}$ ,  $^{13}\text{C}$  NMR and HRMS spectra of the compounds 2a–d, 8b–d, 1b, 1c and 10–13;

DDEPT-135 spectra of the selected compounds

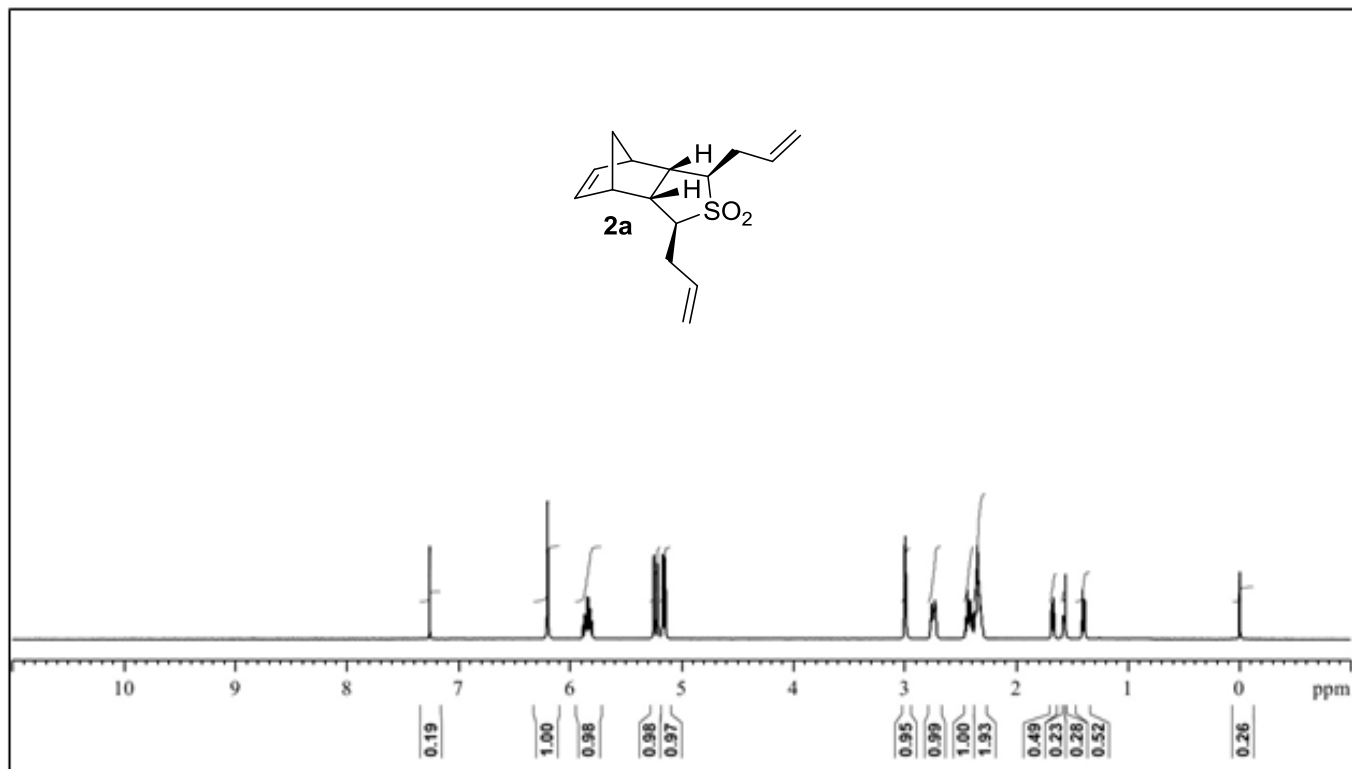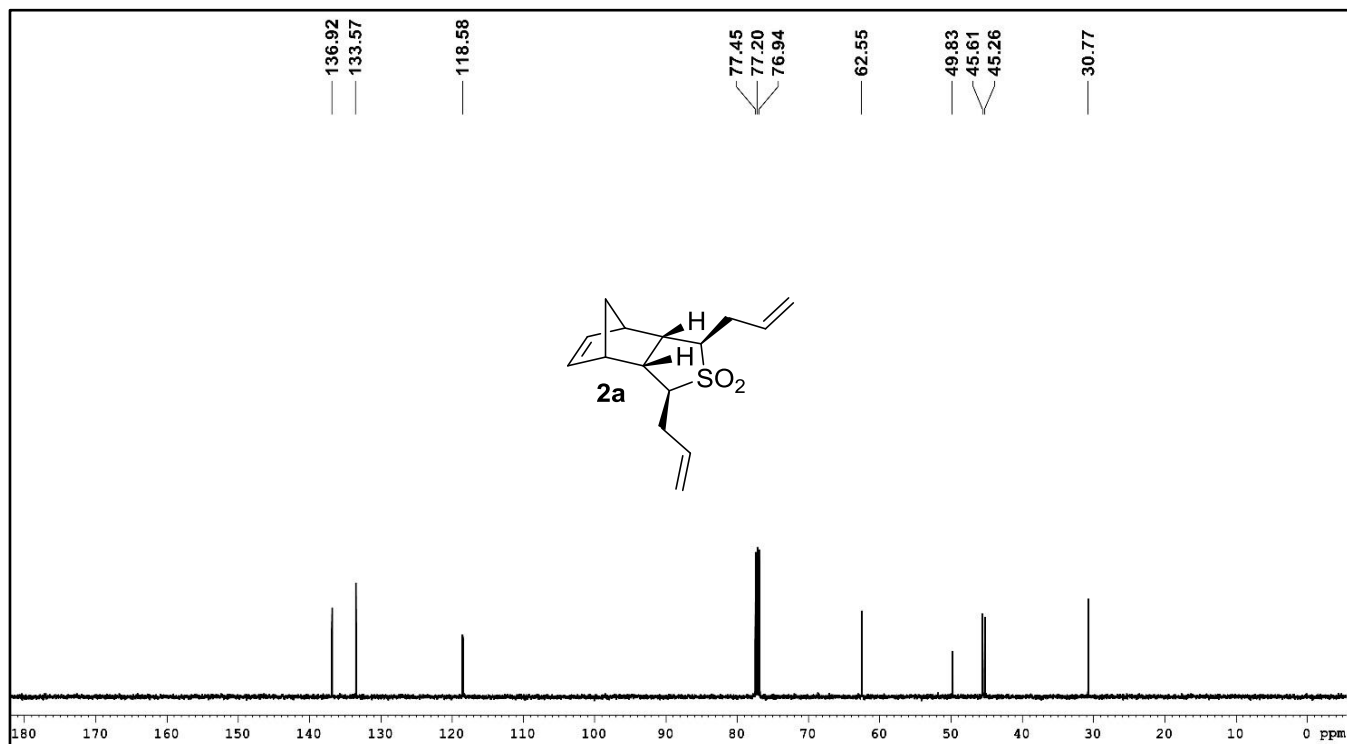

**Acquisition Parameter**

|             |         |                       |           |                  |           |
|-------------|---------|-----------------------|-----------|------------------|-----------|
| Source Type | ESI     | Ion Polarity          | Positive  | Set Nebulizer    | 0.3 Bar   |
| Focus       | Active  | Set Capillary         | 3500 V    | Set Dry Heater   | 180 °C    |
| Scan Begin  | 50 m/z  | Set End Plate Offset  | -500 V    | Set Dry Gas      | 4.0 l/min |
| Scan End    | 700 m/z | Set Collision Cell RF | 160.0 Vpp | Set Divert Valve | Source    |

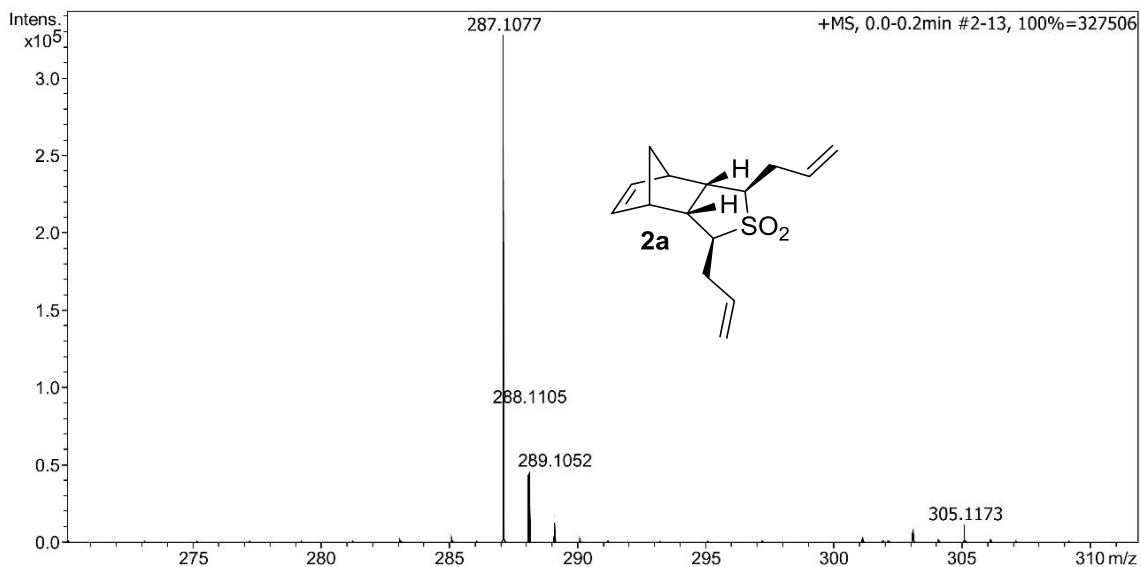

| Meas. m/z | # | Ion Formula                                        | m/z      | err [ppm] | mSigma | # Sigma | Score  | rdb | e <sup>-</sup> Conf | N-Rule |
|-----------|---|----------------------------------------------------|----------|-----------|--------|---------|--------|-----|---------------------|--------|
| 287.1077  | 1 | C <sub>15</sub> H <sub>20</sub> NaO <sub>2</sub> S | 287.1076 | 0.1       | 21.4   | 1       | 100.00 | 5.5 | even                | ok     |

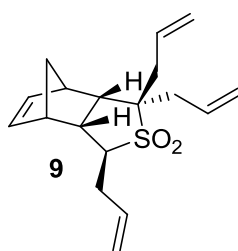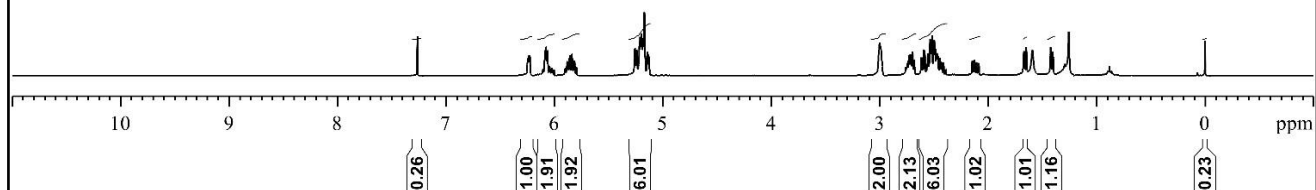

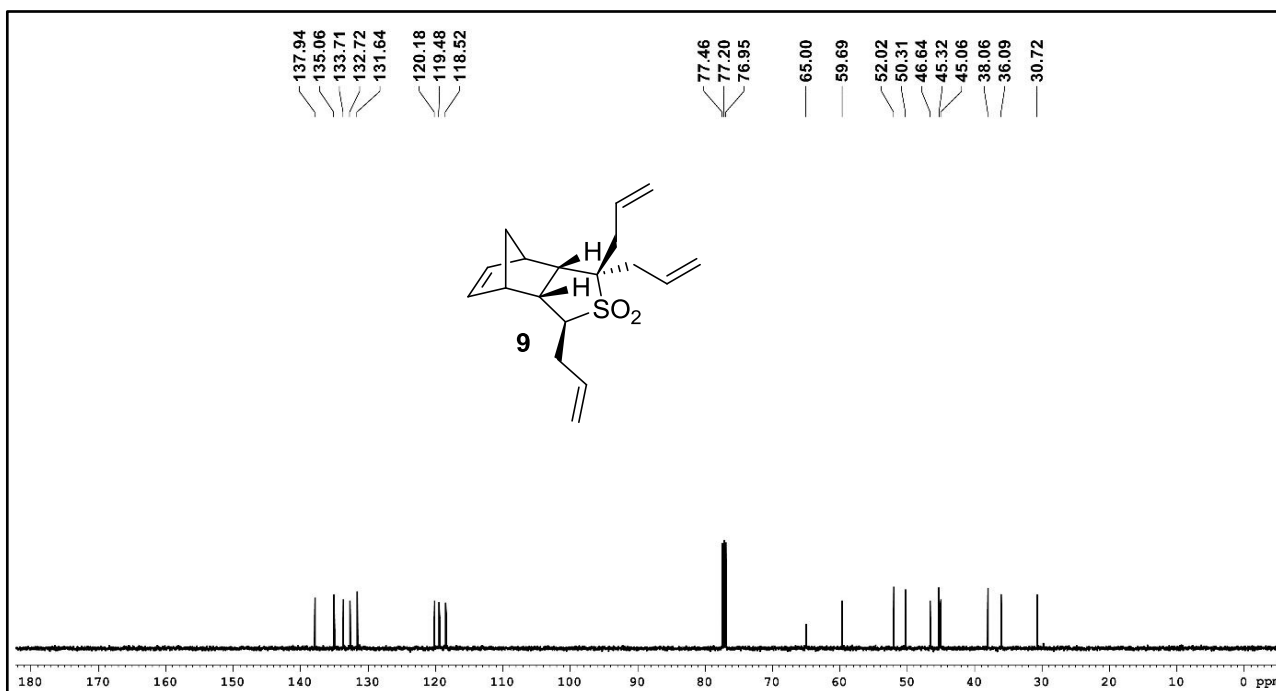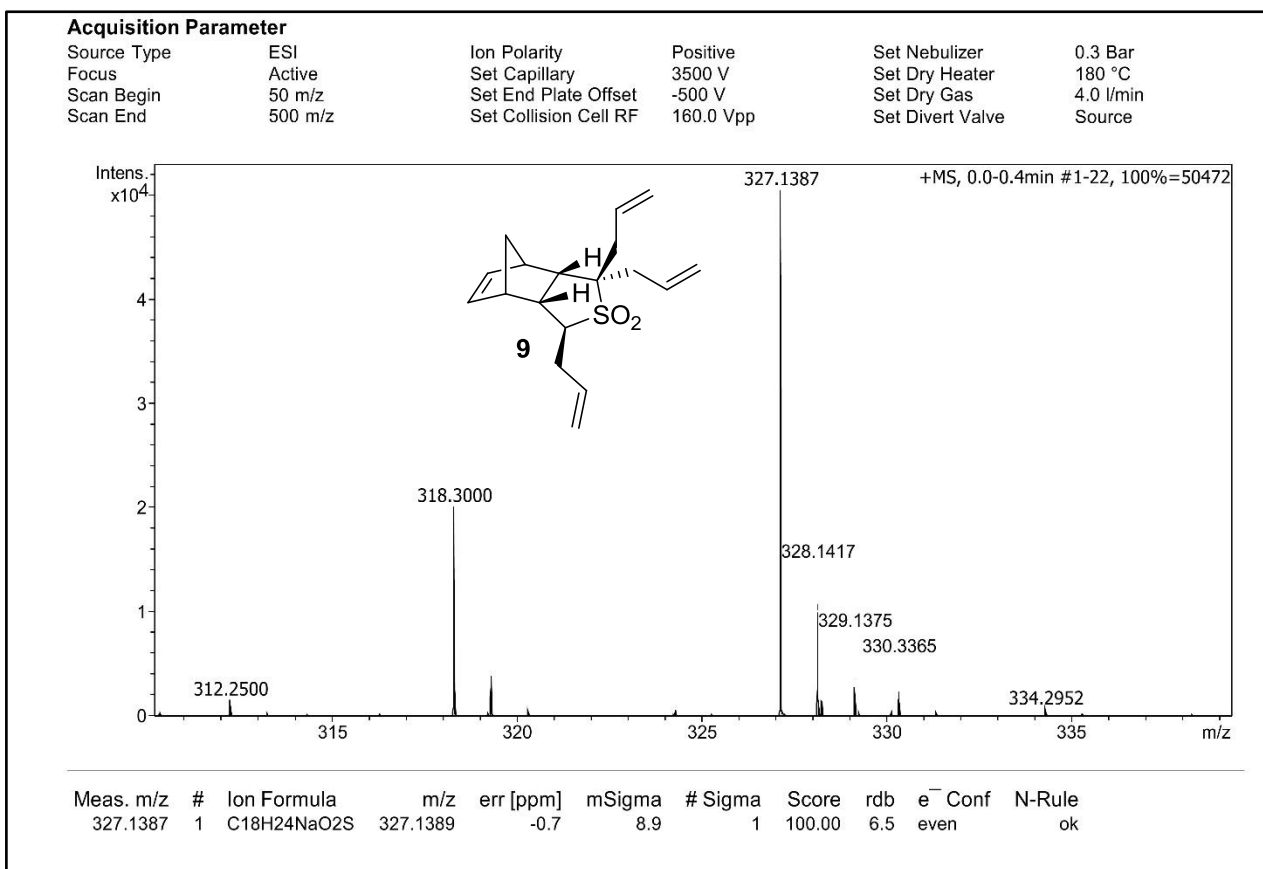



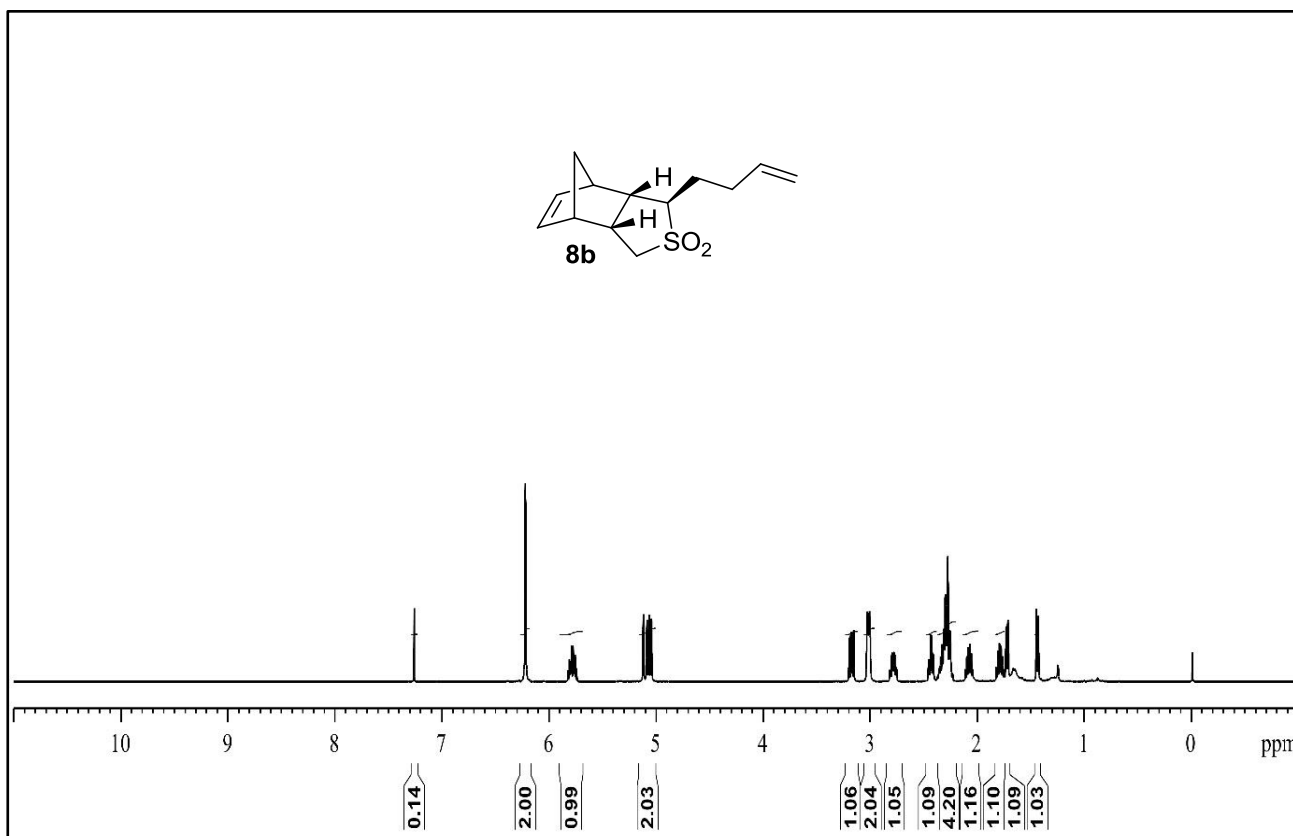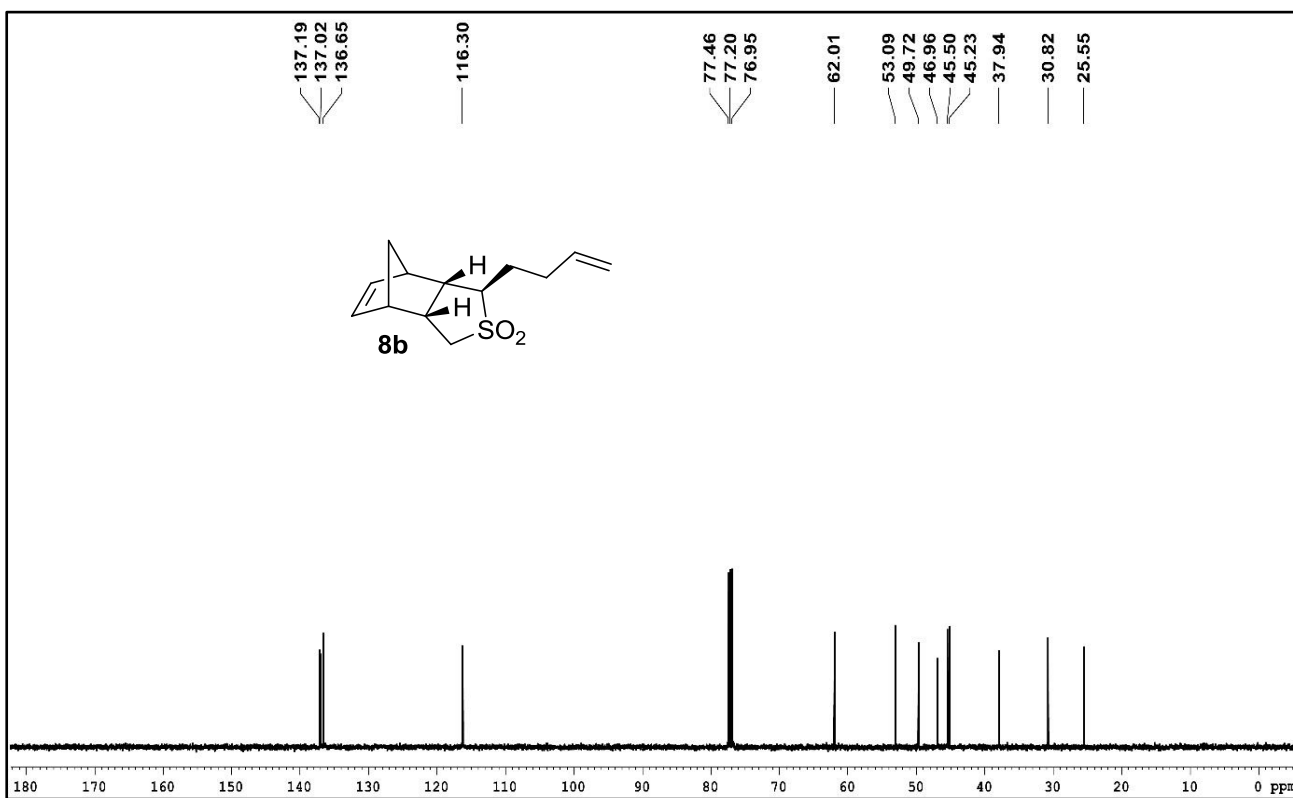

**Acquisition Parameter**

|             |         |                       |            |                  |           |
|-------------|---------|-----------------------|------------|------------------|-----------|
| Source Type | ESI     | Ion Polarity          | Positive   | Set Nebulizer    | 0.3 Bar   |
| Focus       | Active  | Set Capillary         | 3700 V     | Set Dry Heater   | 180 °C    |
| Scan Begin  | 50 m/z  | Set End Plate Offset  | -500 V     | Set Dry Gas      | 4.0 l/min |
| Scan End    | 500 m/z | Set Collision Cell RF | 1500.0 Vpp | Set Divert Valve | Source    |

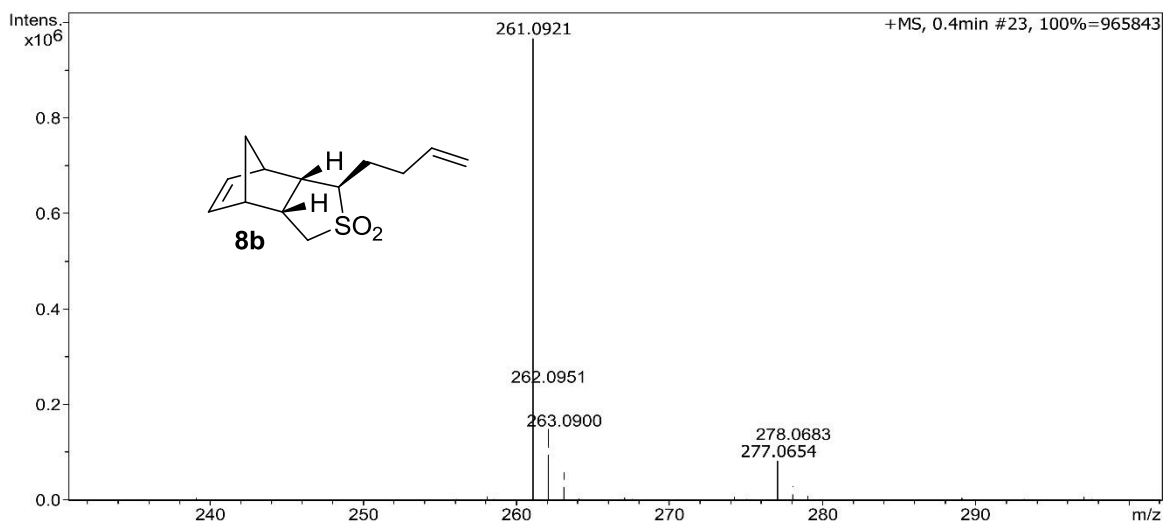

| Meas. m/z | # | Ion Formula                                        | m/z      | err [ppm] | mSigma | # Sigma | Score  | rdb | e <sup>-</sup> Conf | N-Rule |
|-----------|---|----------------------------------------------------|----------|-----------|--------|---------|--------|-----|---------------------|--------|
| 261.0921  | 1 | C <sub>13</sub> H <sub>18</sub> NaO <sub>2</sub> S | 261.0920 | -0.6      | 31.0   | 1       | 100.00 | 4.5 | even                | ok     |

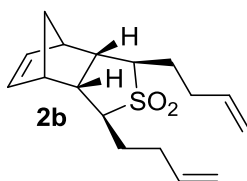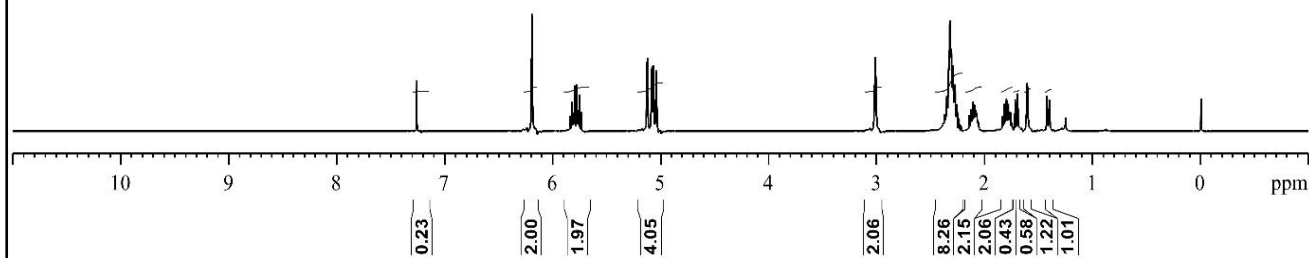

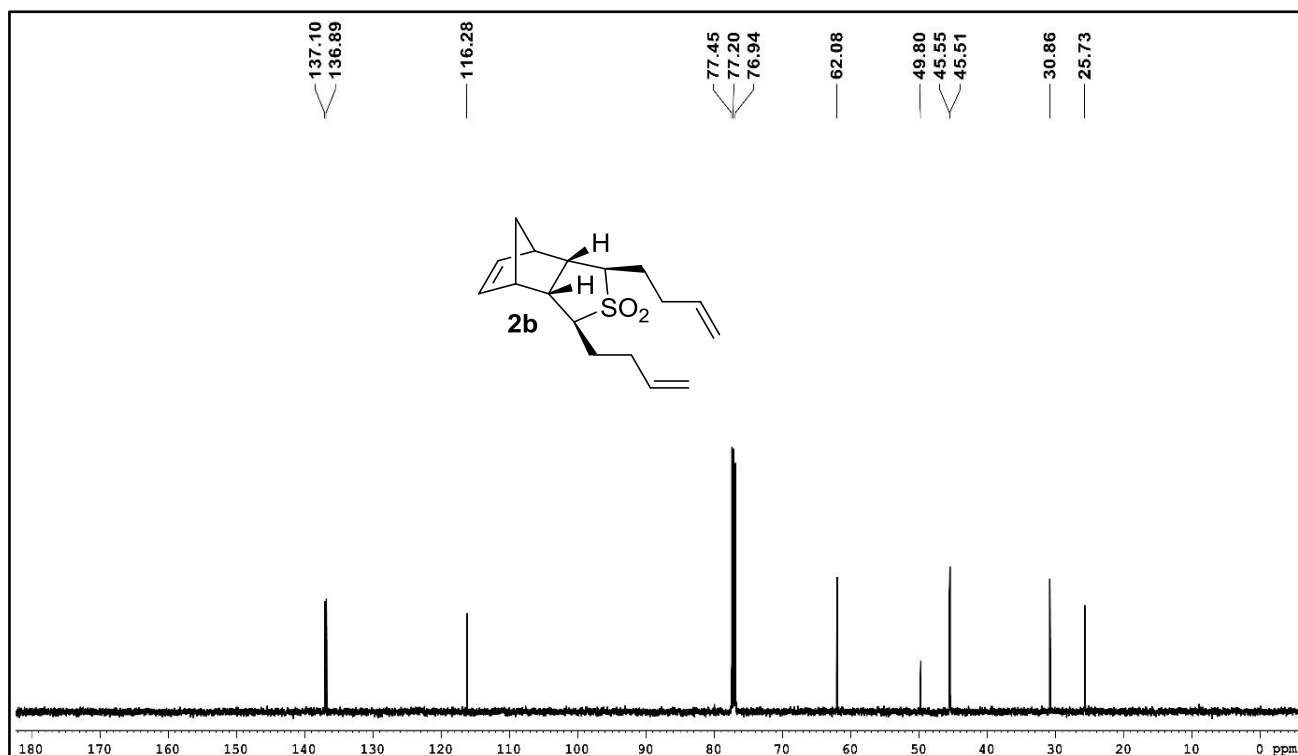

#### Acquisition Parameter

|             |         |                       |            |                  |           |
|-------------|---------|-----------------------|------------|------------------|-----------|
| Source Type | ESI     | Ion Polarity          | Positive   | Set Nebulizer    | 0.3 Bar   |
| Focus       | Active  | Set Capillary         | 3700 V     | Set Dry Heater   | 180 °C    |
| Scan Begin  | 50 m/z  | Set End Plate Offset  | -500 V     | Set Dry Gas      | 4.0 l/min |
| Scan End    | 500 m/z | Set Collision Cell RF | 1500.0 Vpp | Set Divert Valve | Source    |

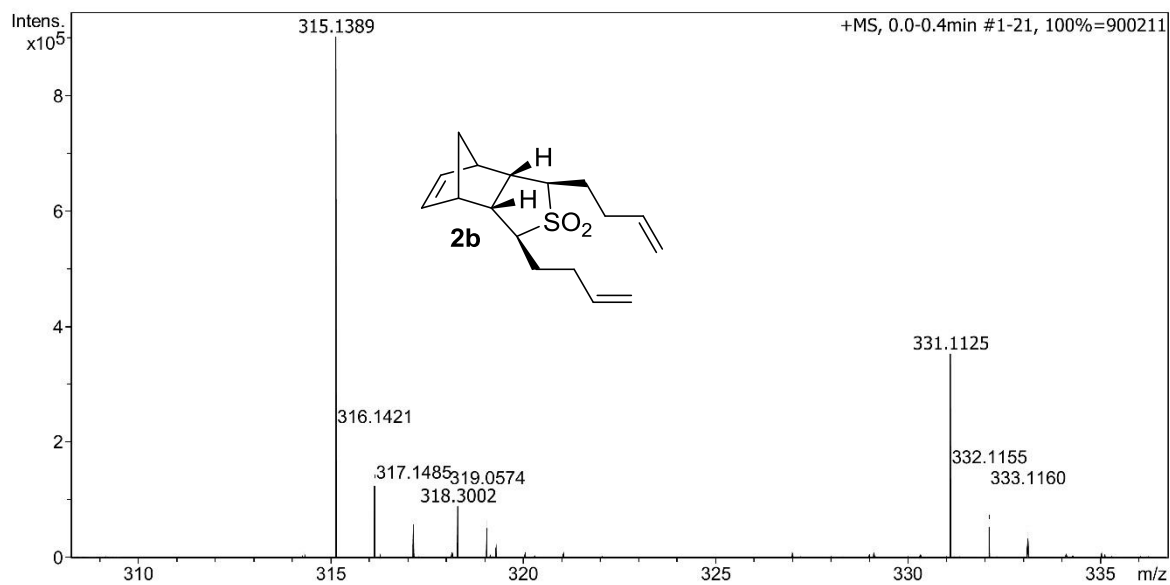

| Meas. m/z | # | Ion Formula                                        | m/z      | err [ppm] | mSigma | # Sigma | Score  | rdb | e <sup>-</sup> Conf | N-Rule |
|-----------|---|----------------------------------------------------|----------|-----------|--------|---------|--------|-----|---------------------|--------|
| 315.1389  | 1 | C <sub>17</sub> H <sub>24</sub> NaO <sub>2</sub> S | 315.1389 | -0.1      | 44.8   | 1       | 100.00 | 5.5 | even                | ok     |

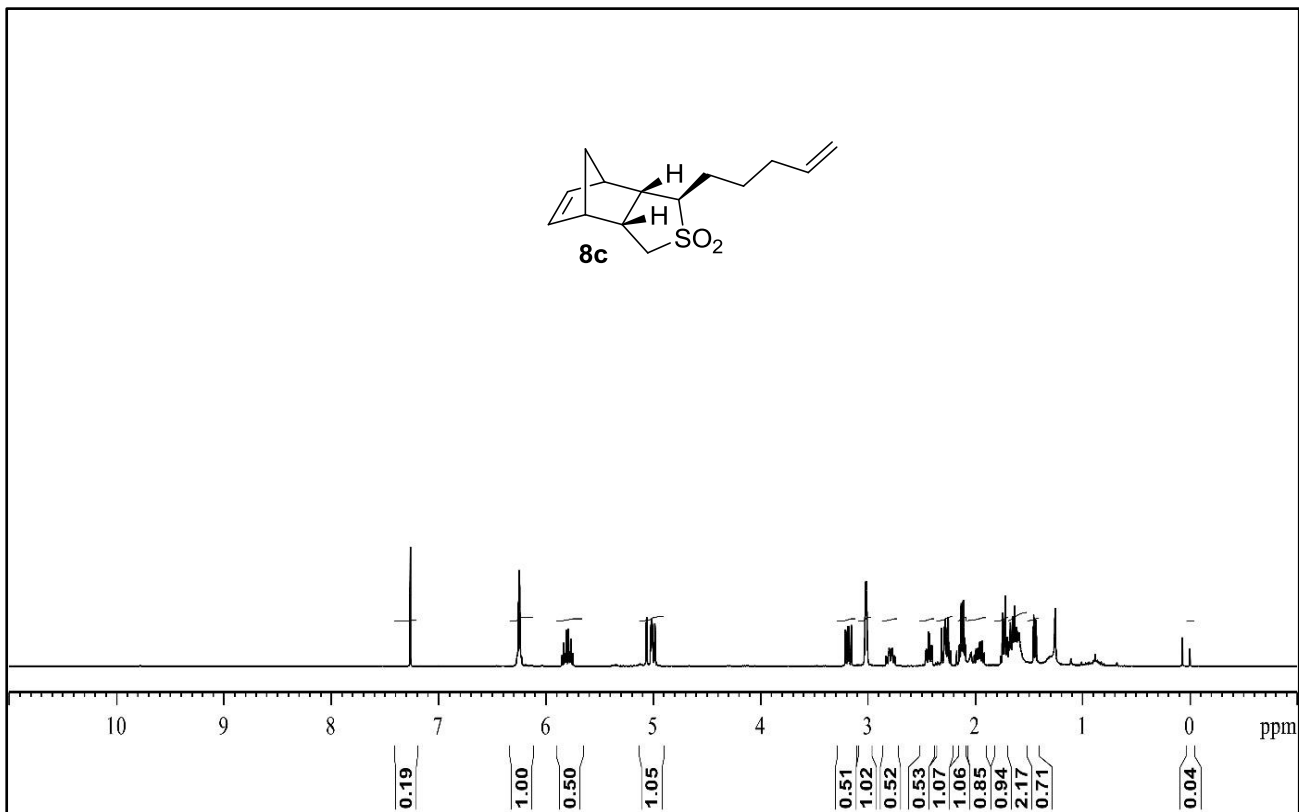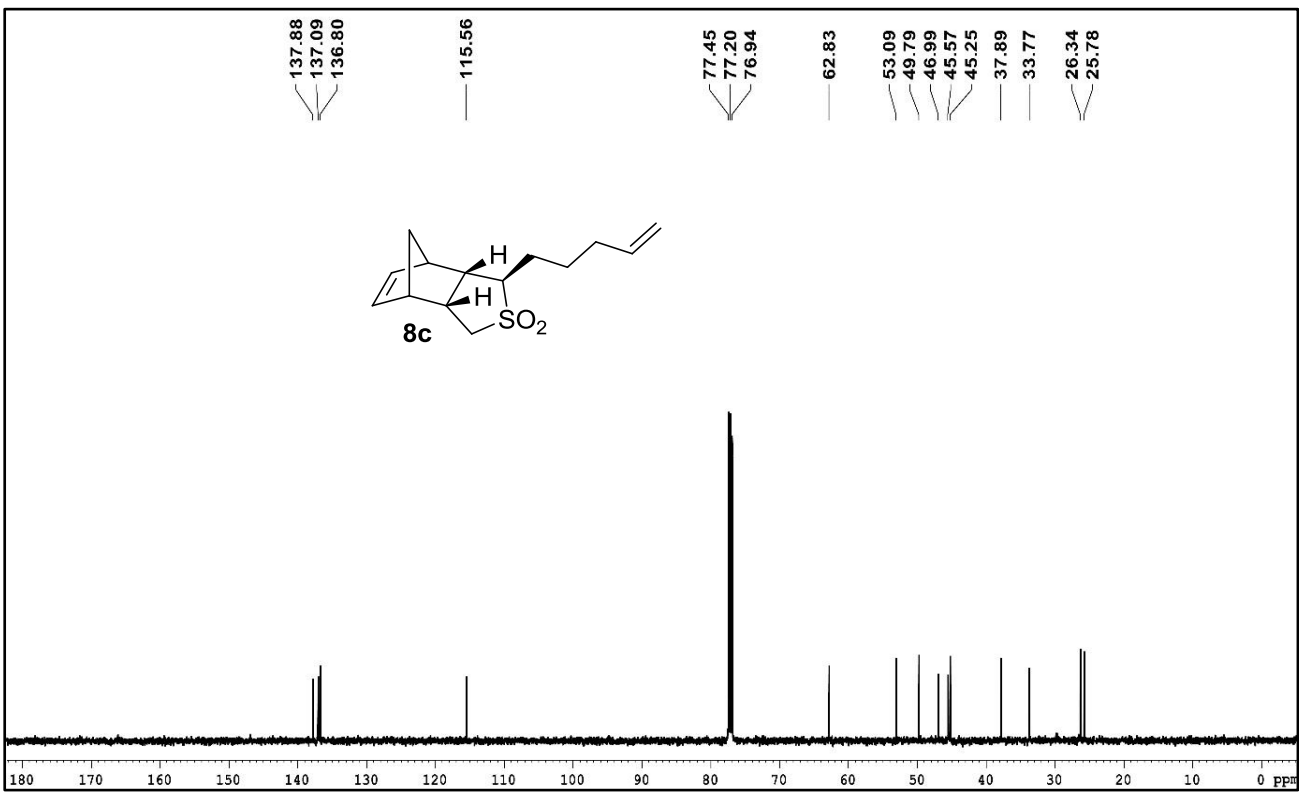

**Acquisition Parameter**

|             |         |                       |            |                  |           |
|-------------|---------|-----------------------|------------|------------------|-----------|
| Source Type | ESI     | Ion Polarity          | Positive   | Set Nebulizer    | 0.3 Bar   |
| Focus       | Active  | Set Capillary         | 3700 V     | Set Dry Heater   | 180 °C    |
| Scan Begin  | 50 m/z  | Set End Plate Offset  | -500 V     | Set Dry Gas      | 4.0 l/min |
| Scan End    | 500 m/z | Set Collision Cell RF | 1500.0 Vpp | Set Divert Valve | Source    |

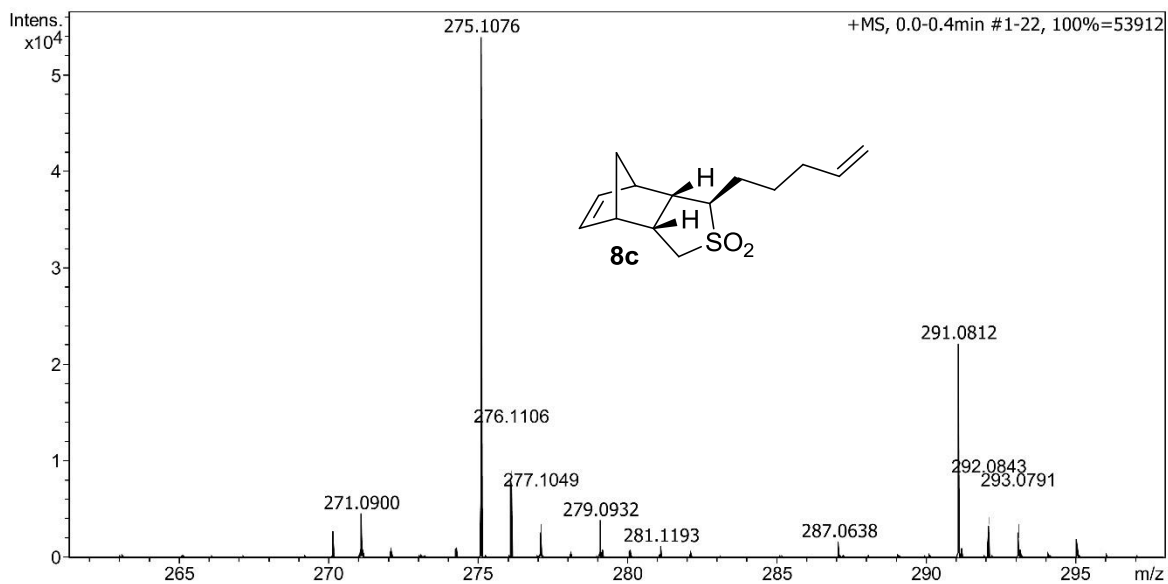

| Meas. m/z | # | Ion Formula | m/z      | err [ppm] | mSigma | # Sigma | Score  | rdb | e <sup>-</sup> Conf | N-Rule |
|-----------|---|-------------|----------|-----------|--------|---------|--------|-----|---------------------|--------|
| 275.1076  | 1 | C14H20NaO2S | 275.1076 | 0.1       | 8.9    | 1       | 100.00 | 4.5 | even                | ok     |

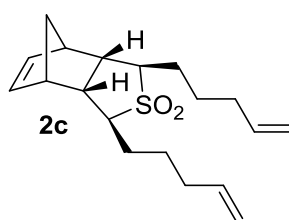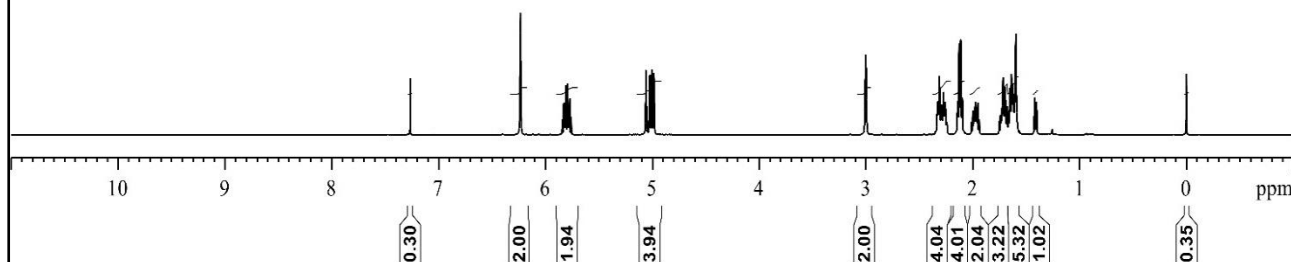

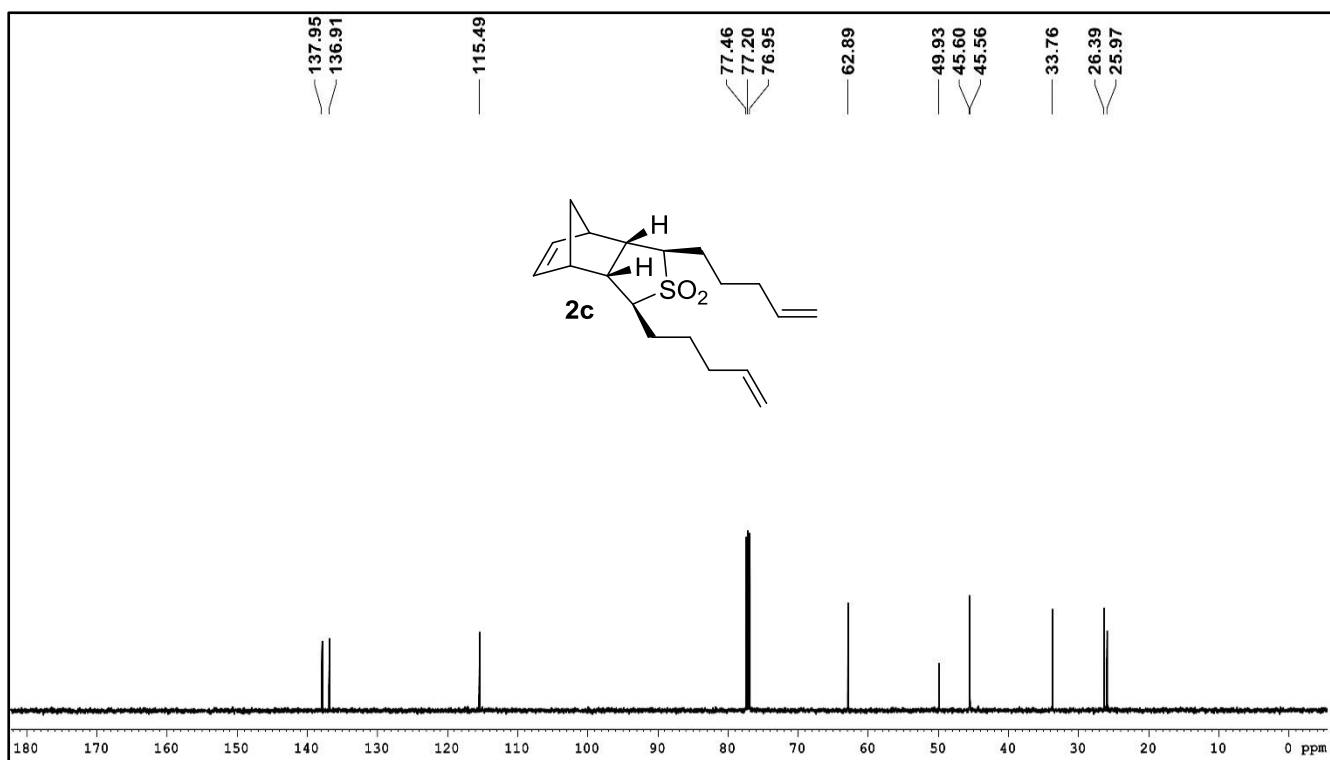

#### Acquisition Parameter

|             |         |                       |            |                  |           |
|-------------|---------|-----------------------|------------|------------------|-----------|
| Source Type | ESI     | Ion Polarity          | Positive   | Set Nebulizer    | 0.3 Bar   |
| Focus       | Active  | Set Capillary         | 3700 V     | Set Dry Heater   | 180 °C    |
| Scan Begin  | 50 m/z  | Set End Plate Offset  | -500 V     | Set Dry Gas      | 4.0 l/min |
| Scan End    | 500 m/z | Set Collision Cell RF | 1500.0 Vpp | Set Divert Valve | Source    |

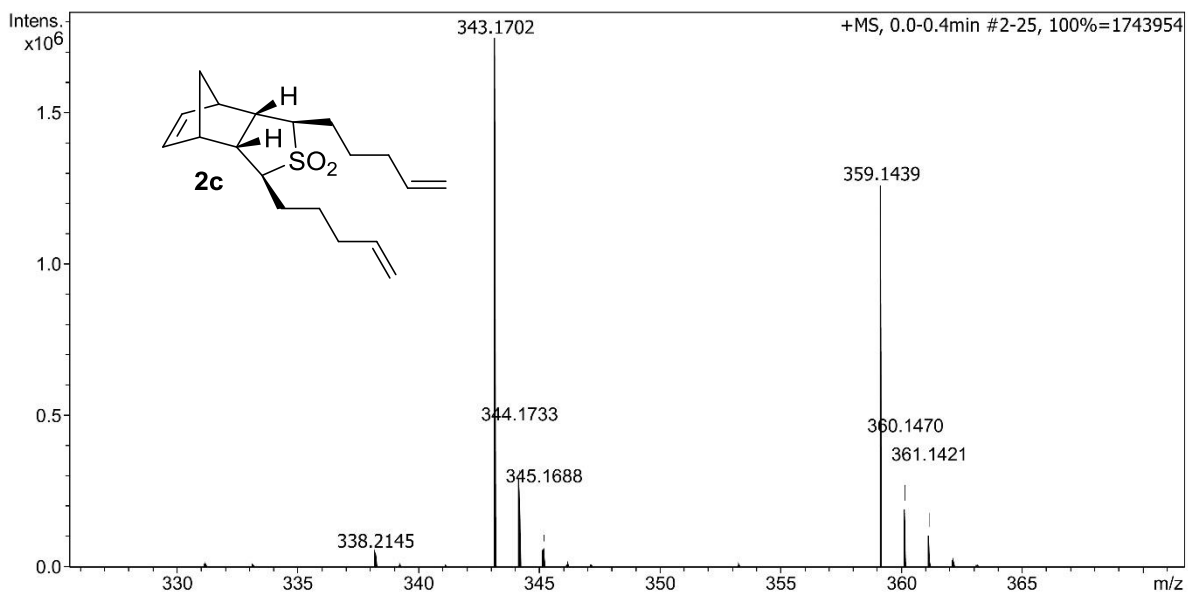

| Meas. m/z | # | Ion Formula                                        | m/z      | err [ppm] | mSigma | # Sigma | Score  | rdb | e <sup>-</sup> Conf | N-Rule |
|-----------|---|----------------------------------------------------|----------|-----------|--------|---------|--------|-----|---------------------|--------|
| 343.1702  | 1 | C <sub>19</sub> H <sub>28</sub> NaO <sub>2</sub> S | 343.1702 | -0.0      | 32.4   | 1       | 100.00 | 5.5 | even                | ok     |

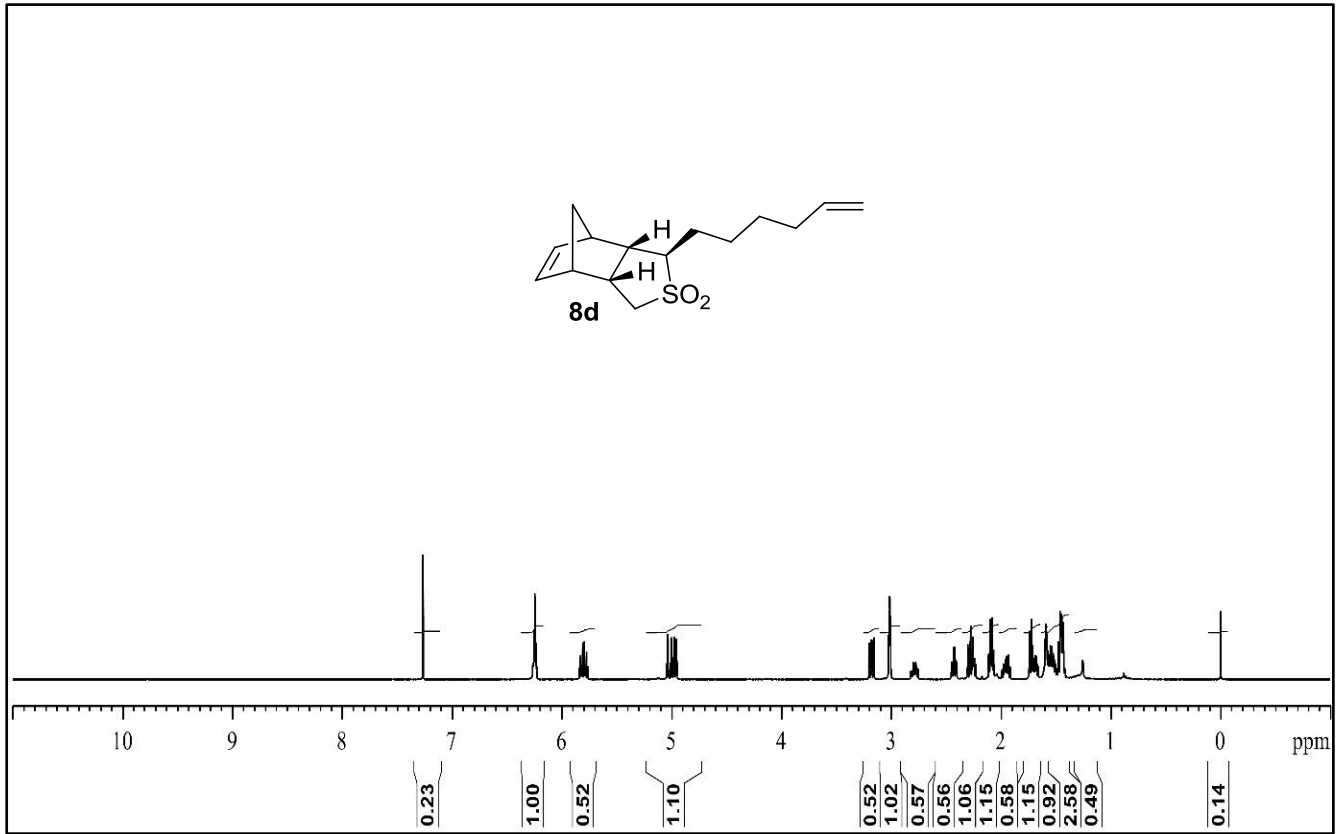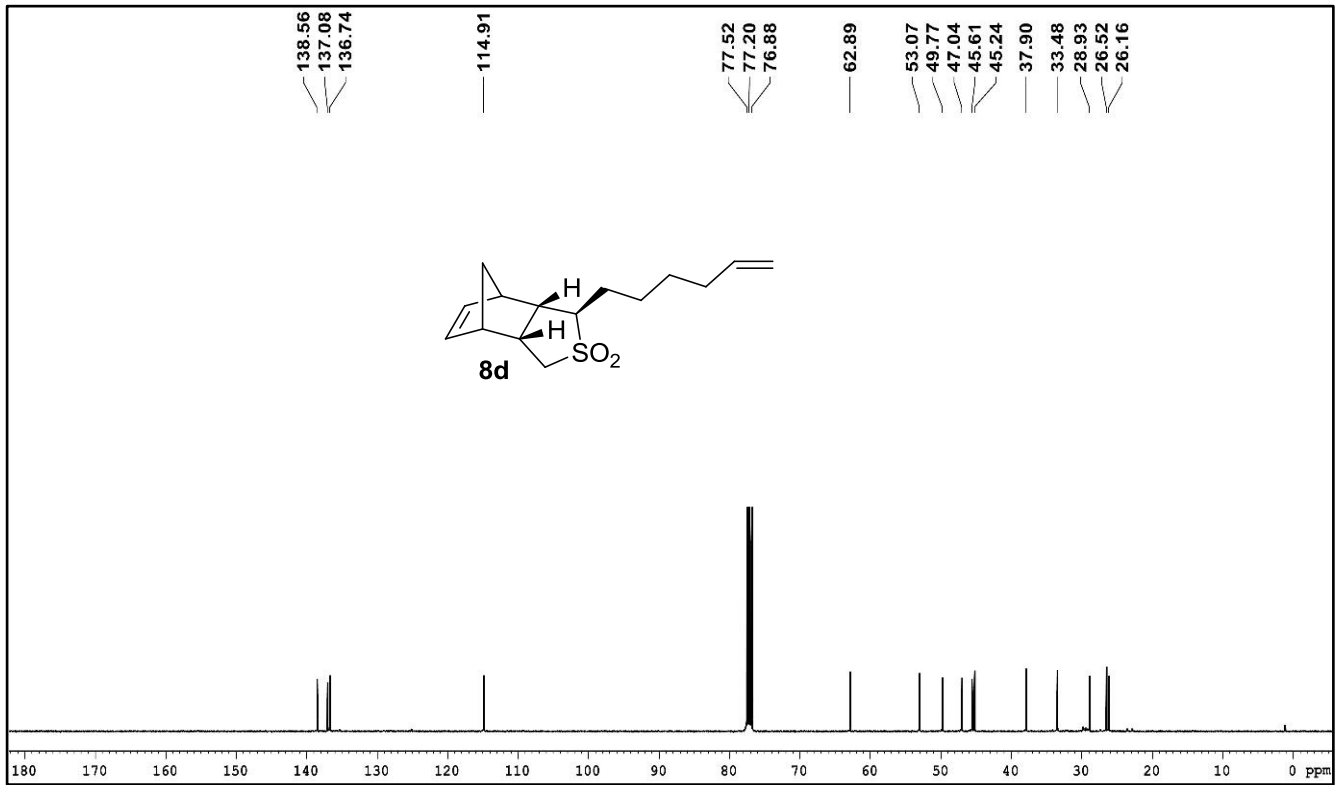

**Acquisition Parameter**

|             |         |                       |            |                  |           |
|-------------|---------|-----------------------|------------|------------------|-----------|
| Source Type | ESI     | Ion Polarity          | Positive   | Set Nebulizer    | 0.3 Bar   |
| Focus       | Active  | Set Capillary         | 3700 V     | Set Dry Heater   | 180 °C    |
| Scan Begin  | 50 m/z  | Set End Plate Offset  | -500 V     | Set Dry Gas      | 4.0 l/min |
| Scan End    | 500 m/z | Set Collision Cell RF | 1500.0 Vpp | Set Divert Valve | Source    |

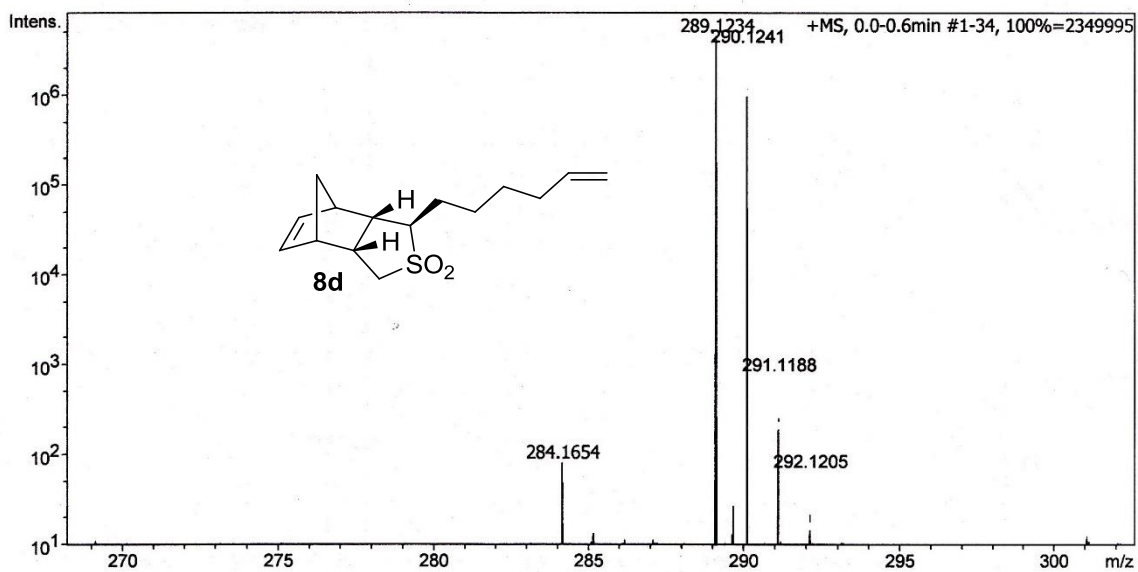

| Meas. m/z | # | Ion Formula                                        | m/z      | err [ppm] | mSigma | # Sigma | Score  | rdb | e <sup>-</sup> Conf | N-Rule |
|-----------|---|----------------------------------------------------|----------|-----------|--------|---------|--------|-----|---------------------|--------|
| 289.1234  | 1 | C <sub>15</sub> H <sub>22</sub> NaO <sub>2</sub> S | 289.1233 | -0.4      | 363.3  | 1       | 100.00 | 4.5 | even                | ok     |

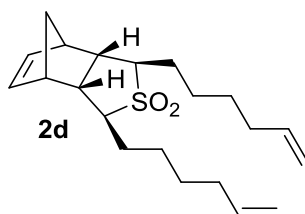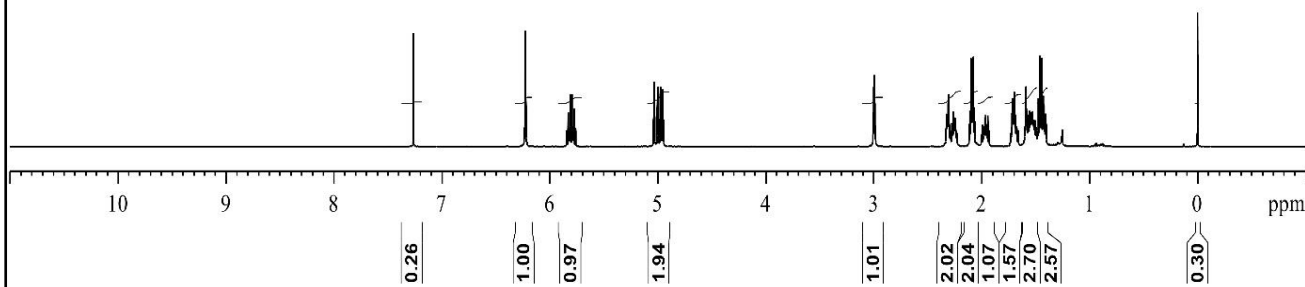



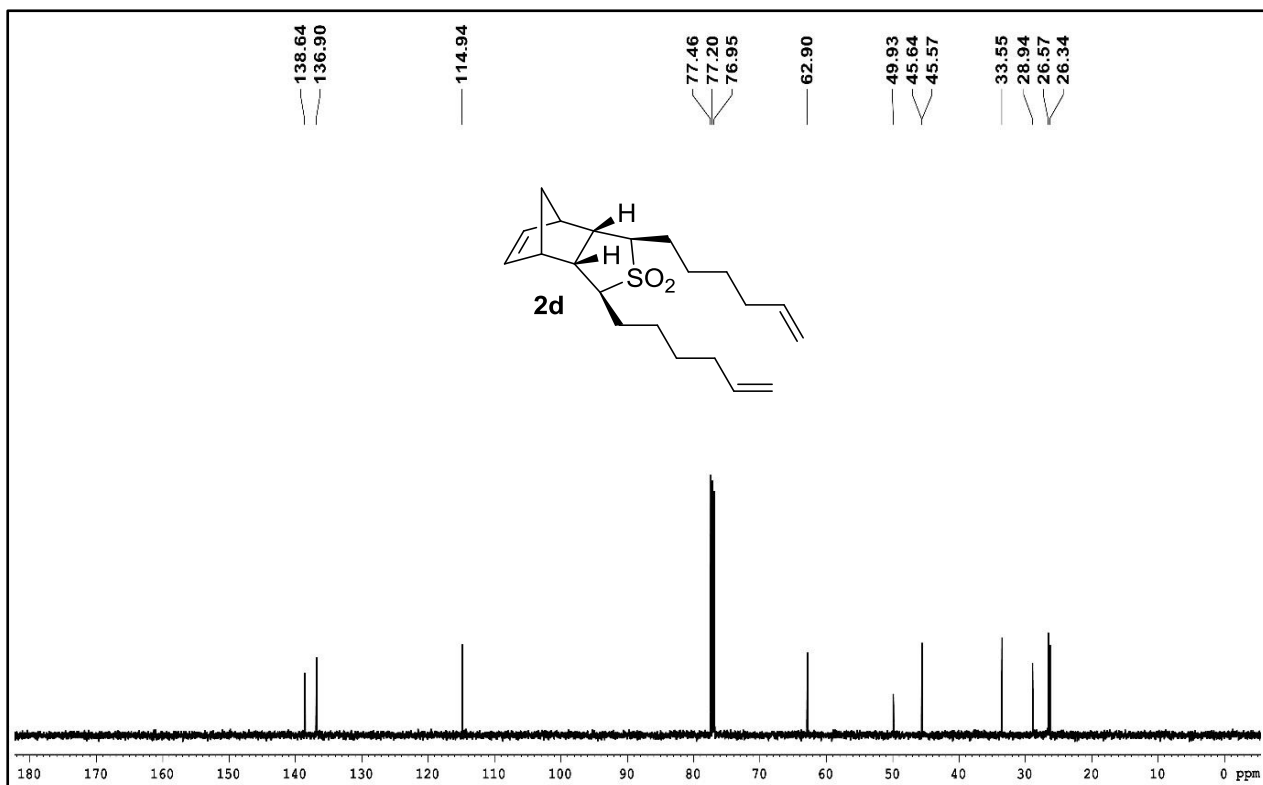

#### Acquisition Parameter

|             |         |                       |            |                  |           |
|-------------|---------|-----------------------|------------|------------------|-----------|
| Source Type | ESI     | Ion Polarity          | Positive   | Set Nebulizer    | 0.3 Bar   |
| Focus       | Active  | Set Capillary         | 3700 V     | Set Dry Heater   | 180 °C    |
| Scan Begin  | 50 m/z  | Set End Plate Offset  | -500 V     | Set Dry Gas      | 4.0 l/min |
| Scan End    | 500 m/z | Set Collision Cell RF | 1500.0 Vpp | Set Divert Valve | Source    |

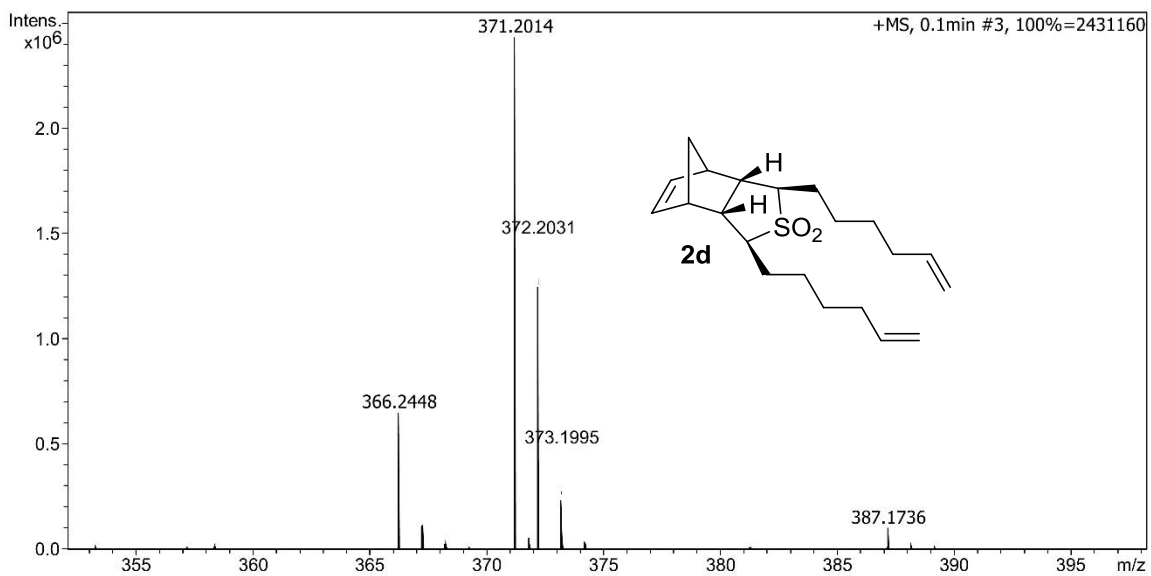

| Meas. m/z | # | Ion Formula                                        | m/z      | err [ppm] | mSigma | # Sigma | Score  | rdb | e <sup>-</sup> Conf | N-Rule |
|-----------|---|----------------------------------------------------|----------|-----------|--------|---------|--------|-----|---------------------|--------|
| 371.2014  | 1 | C <sub>21</sub> H <sub>32</sub> NaO <sub>2</sub> S | 371.2015 | -0.4      | 136.5  | 1       | 100.00 | 5.5 | even                | ok     |

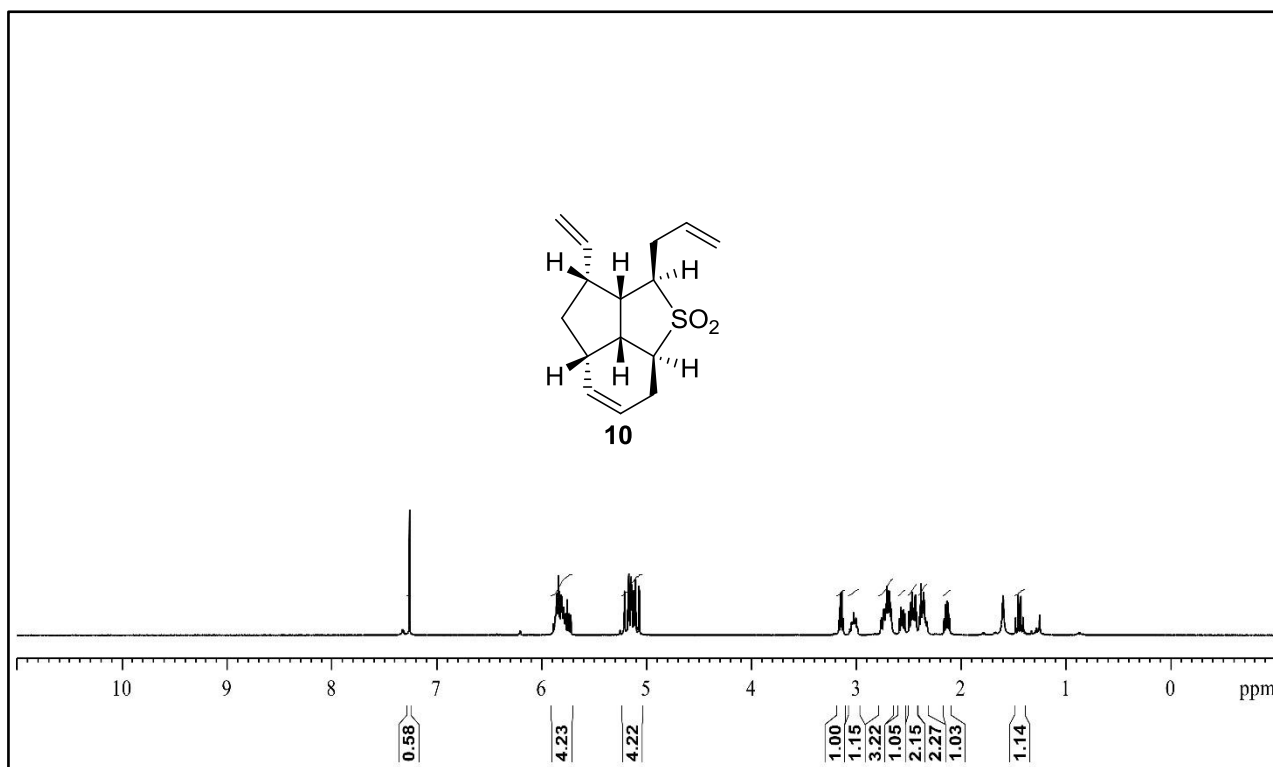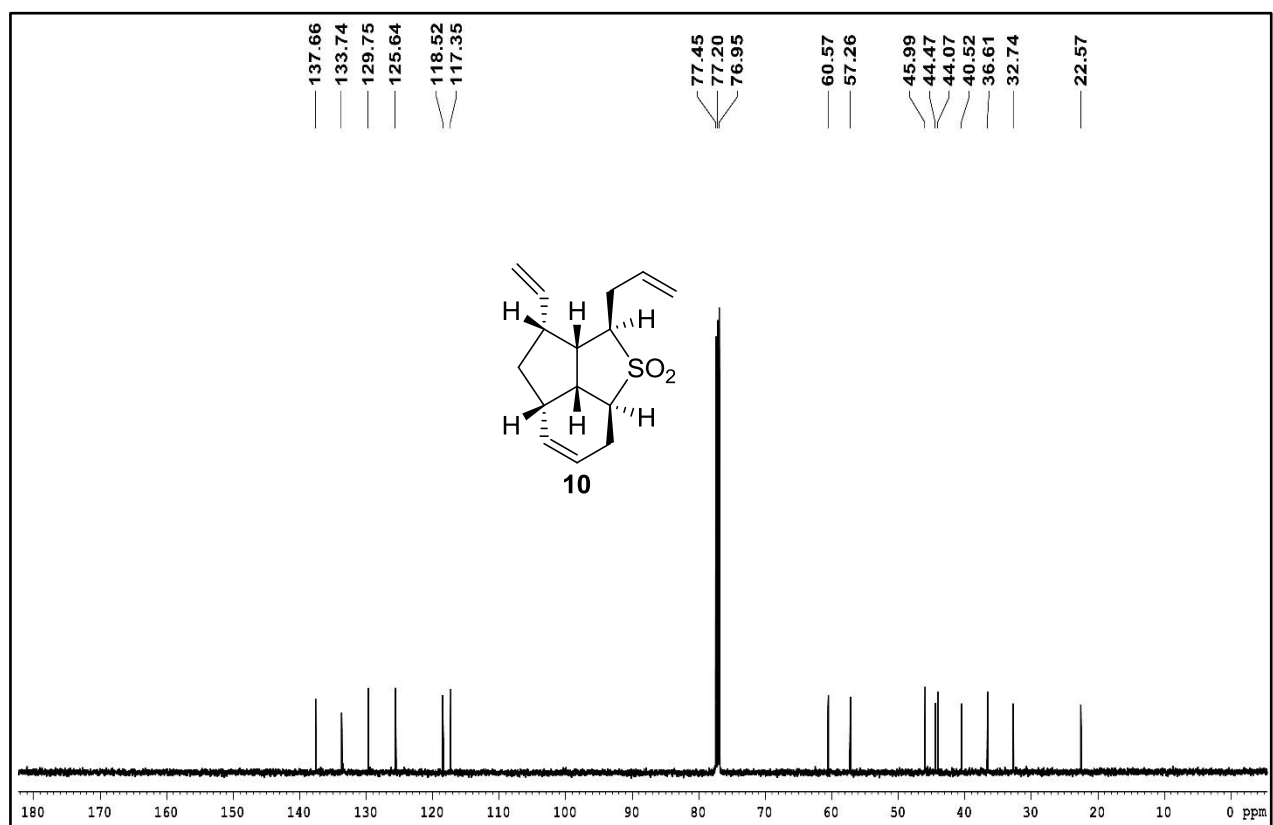

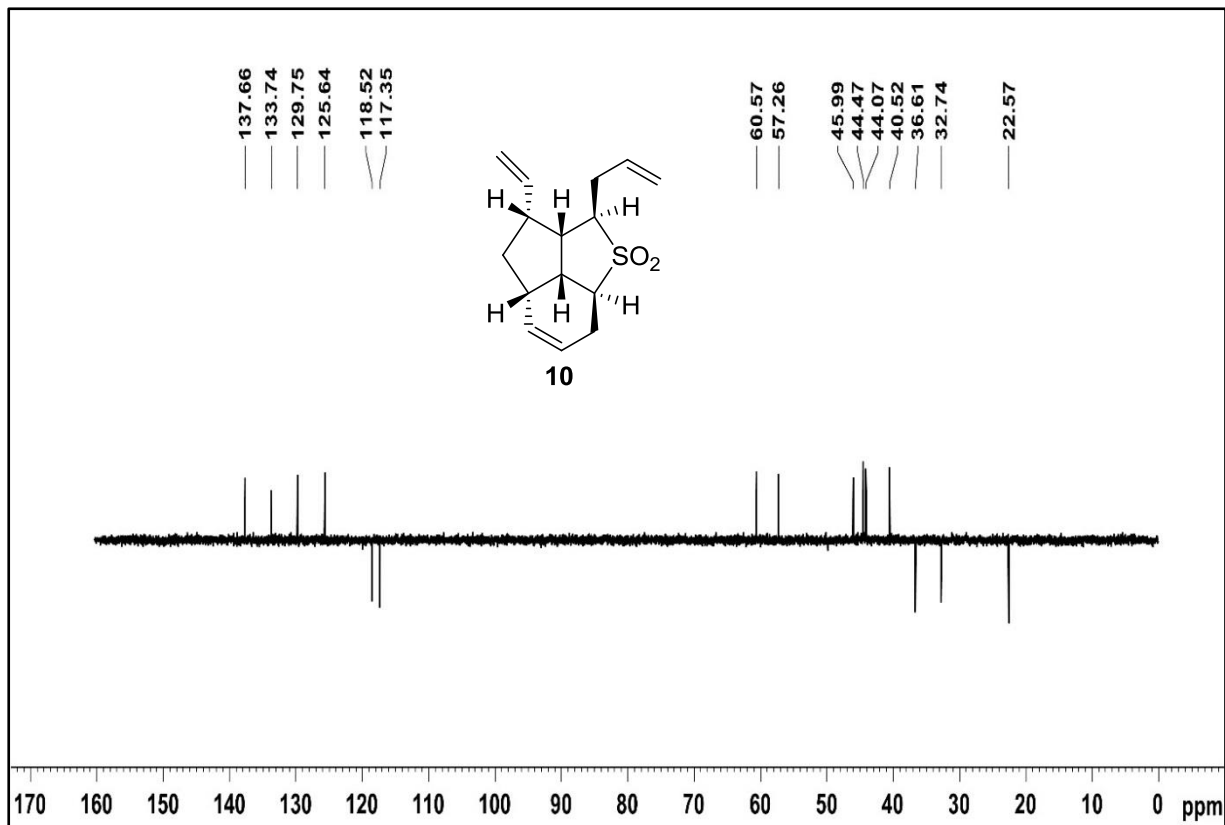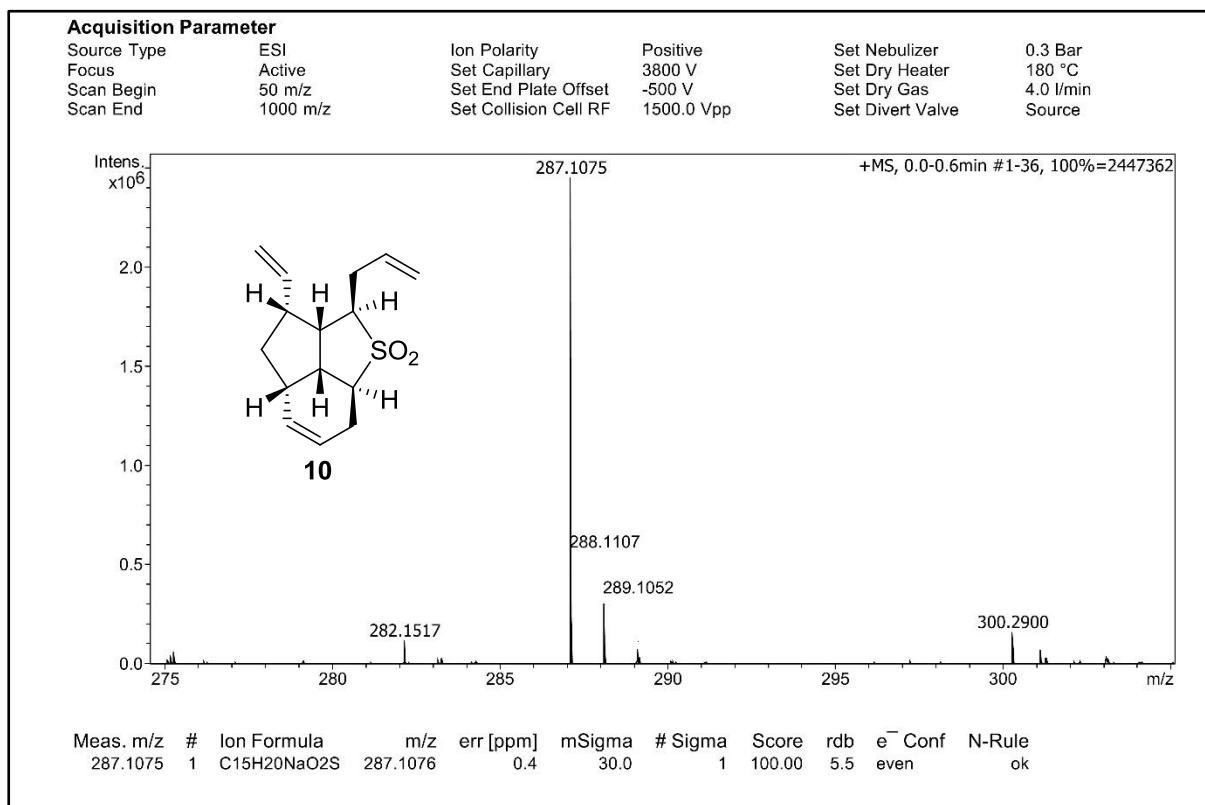

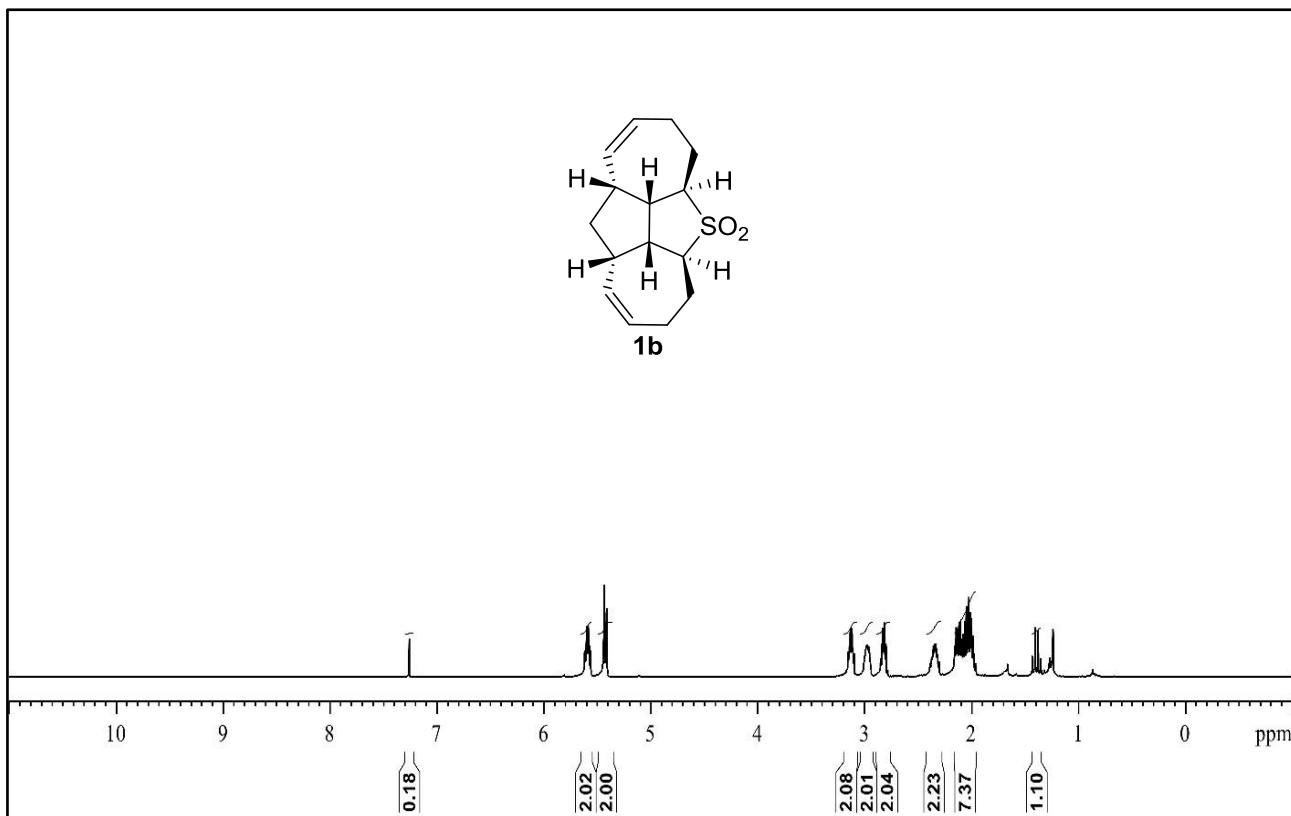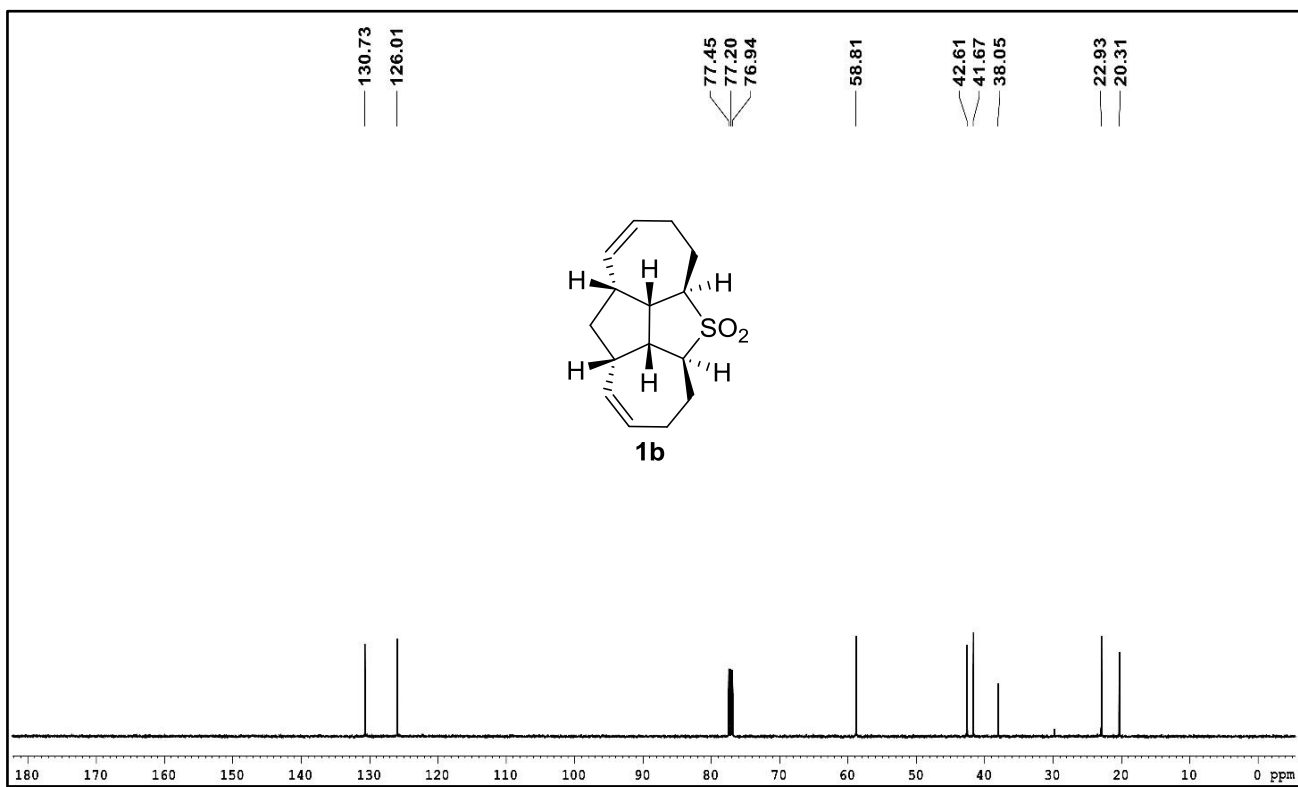

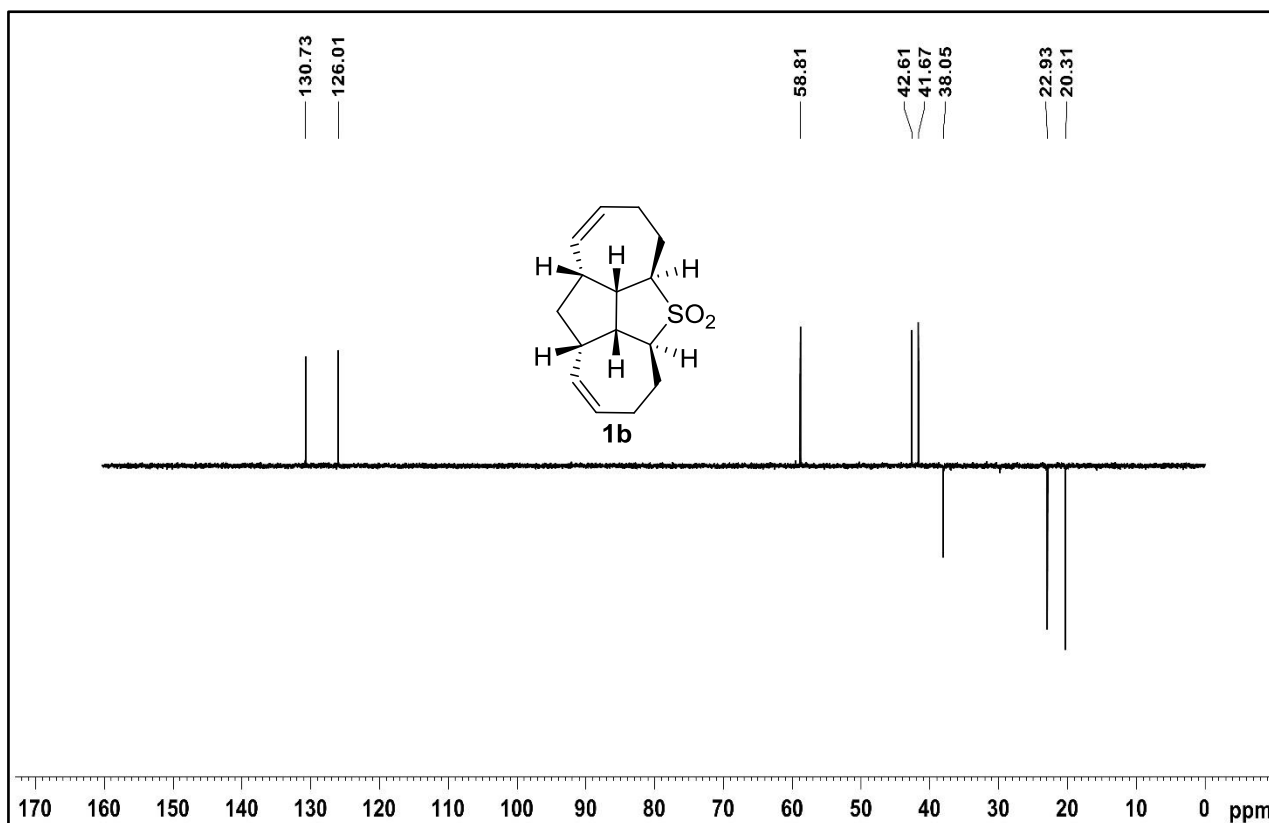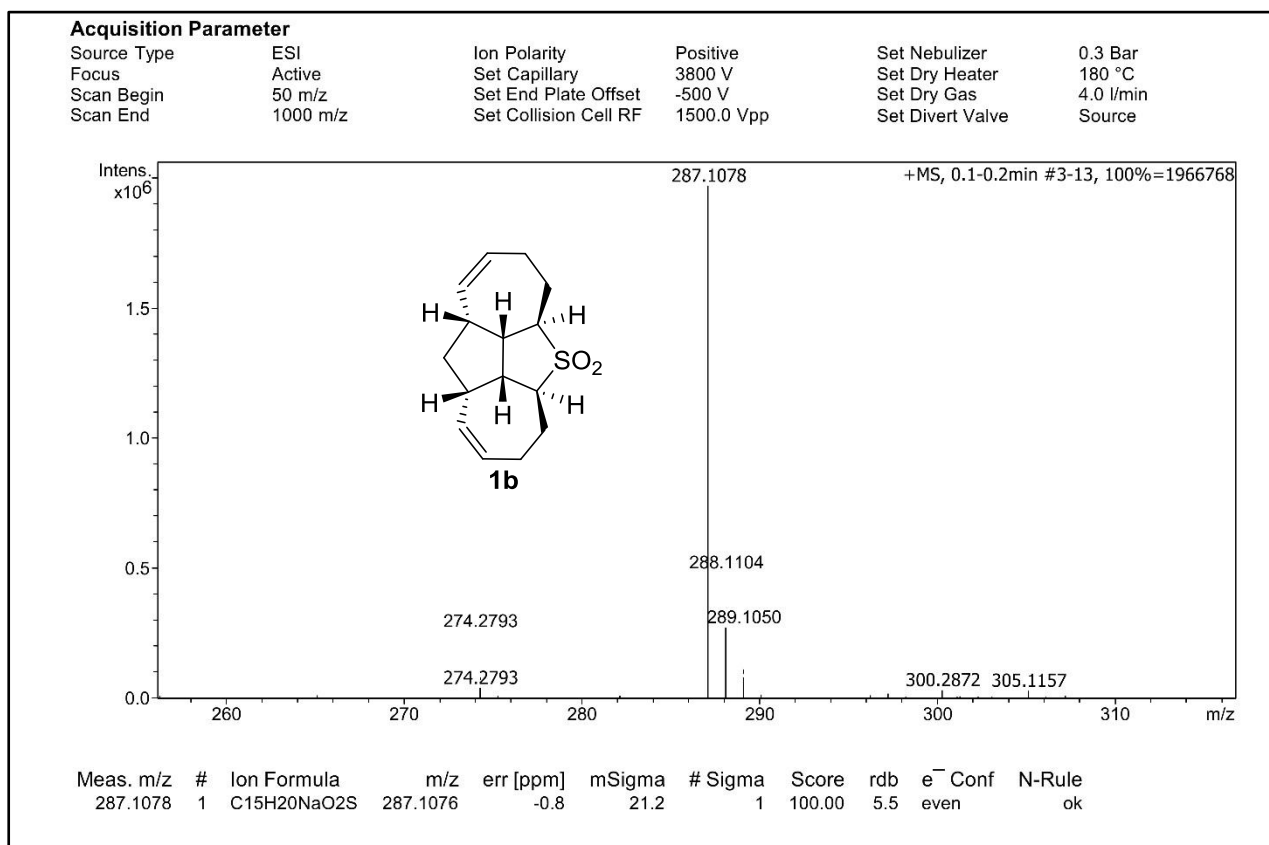

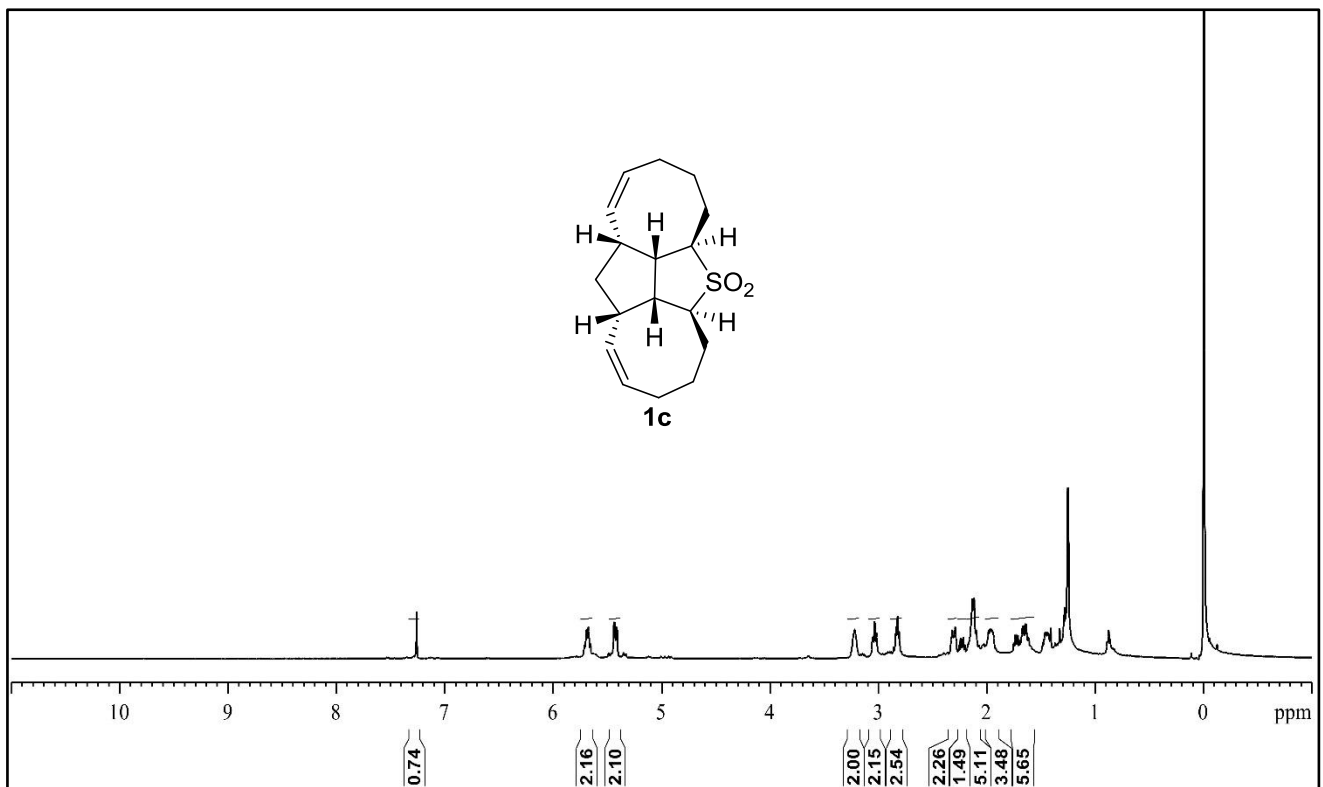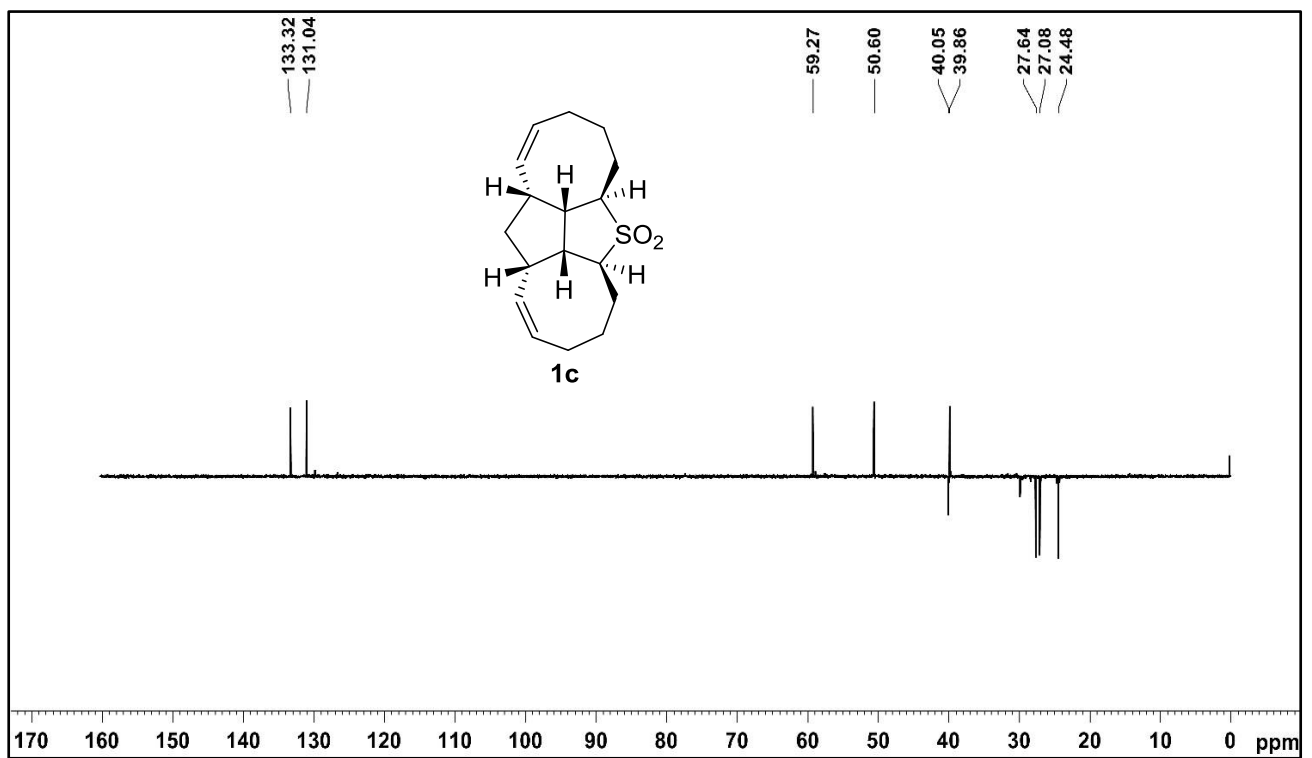

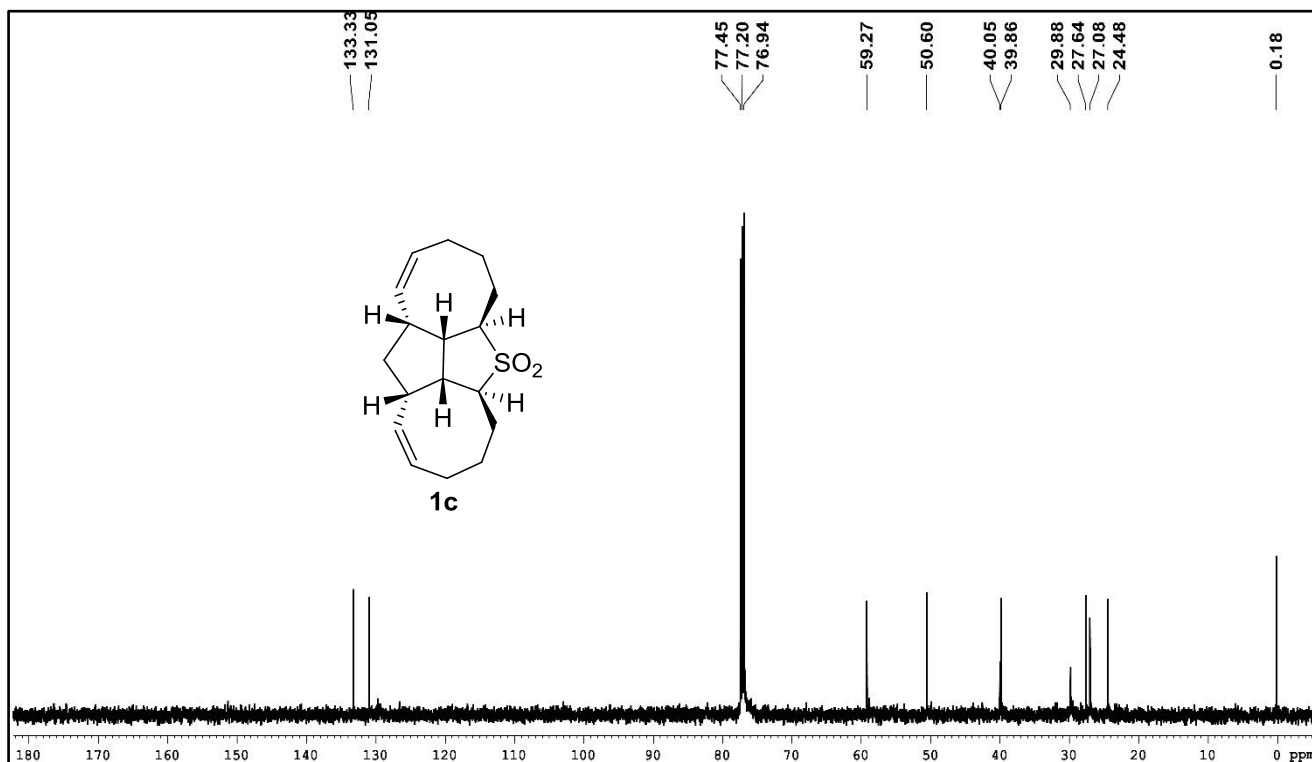

#### Acquisition Parameter

|             |          |                       |            |                  |           |
|-------------|----------|-----------------------|------------|------------------|-----------|
| Source Type | ESI      | Ion Polarity          | Positive   | Set Nebulizer    | 0.3 Bar   |
| Focus       | Active   | Set Capillary         | 3800 V     | Set Dry Heater   | 180 °C    |
| Scan Begin  | 50 m/z   | Set End Plate Offset  | -500 V     | Set Dry Gas      | 4.0 l/min |
| Scan End    | 1000 m/z | Set Collision Cell RF | 1500.0 Vpp | Set Divert Valve | Source    |

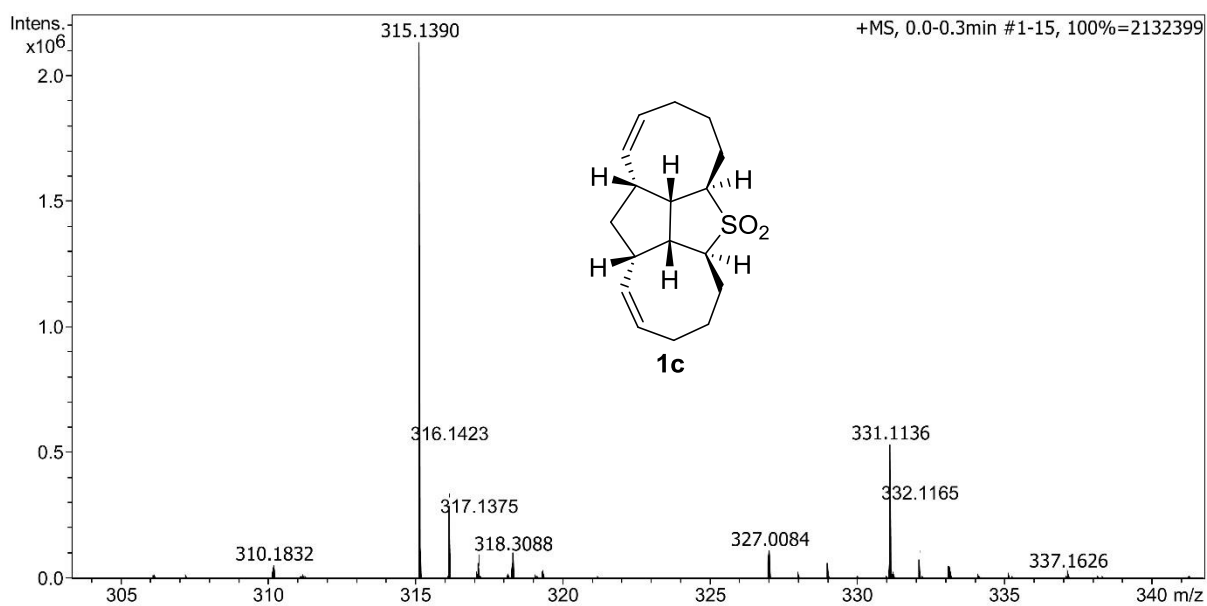

| Meas. m/z | # | Ion Formula                                        | m/z      | err [ppm] | mSigma | # Sigma | Score  | rdb | e <sup>-</sup> Conf | N-Rule |
|-----------|---|----------------------------------------------------|----------|-----------|--------|---------|--------|-----|---------------------|--------|
| 315.1390  | 1 | C <sub>17</sub> H <sub>24</sub> NaO <sub>2</sub> S | 315.1389 | 0.3       | 35.7   | 1       | 100.00 | 5.5 | even                | ok     |

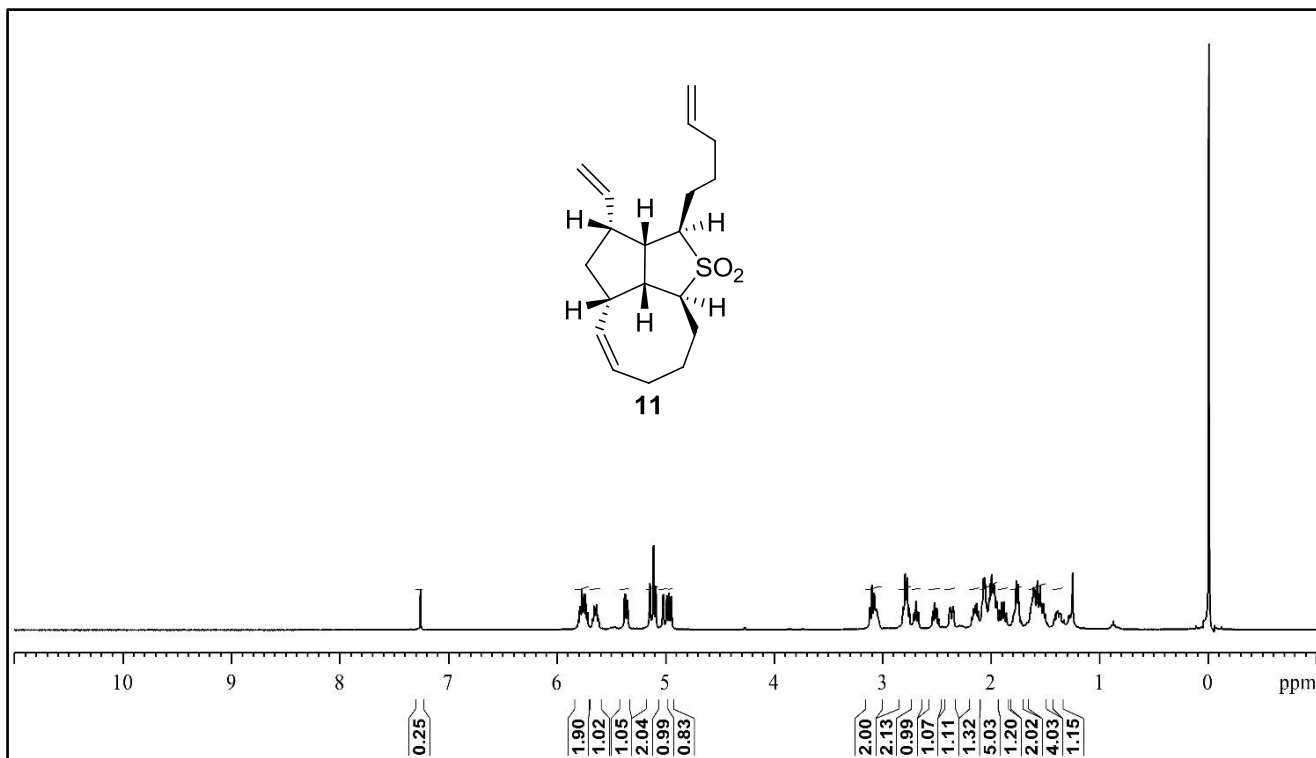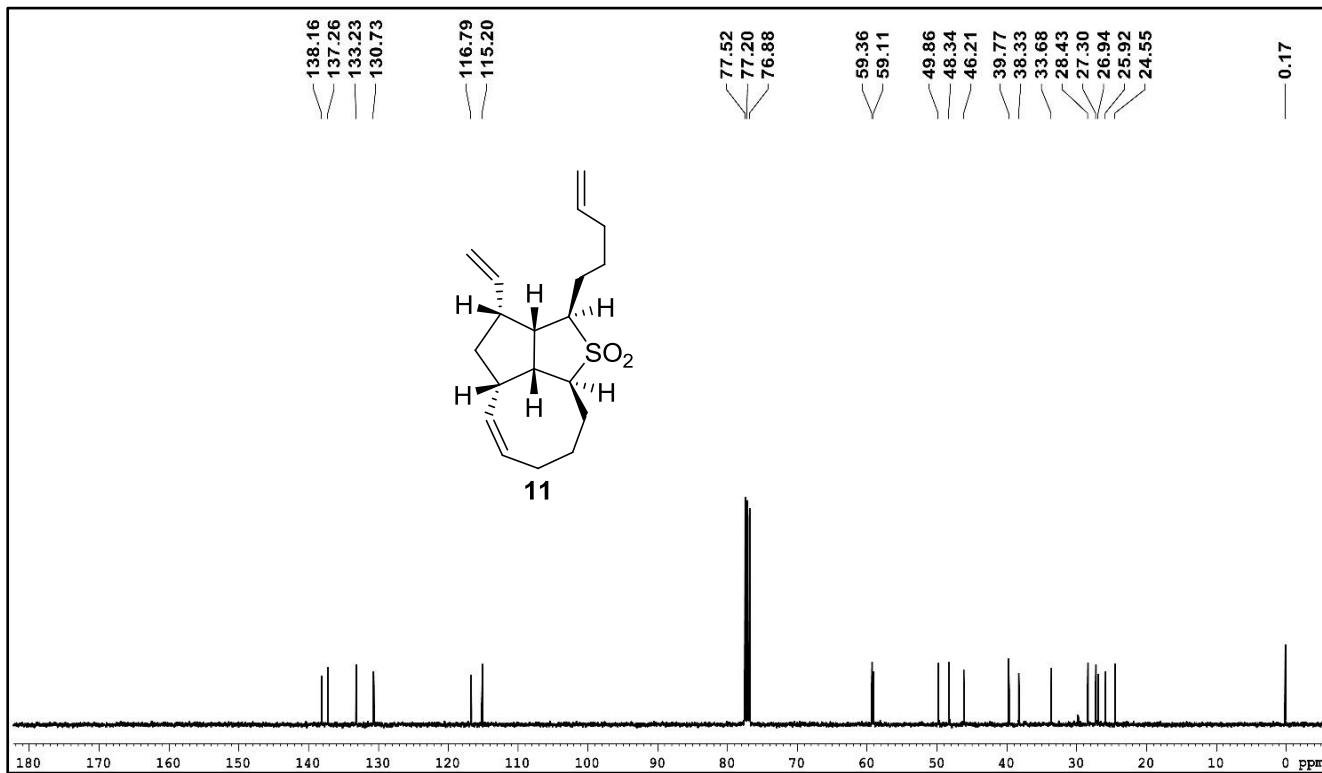



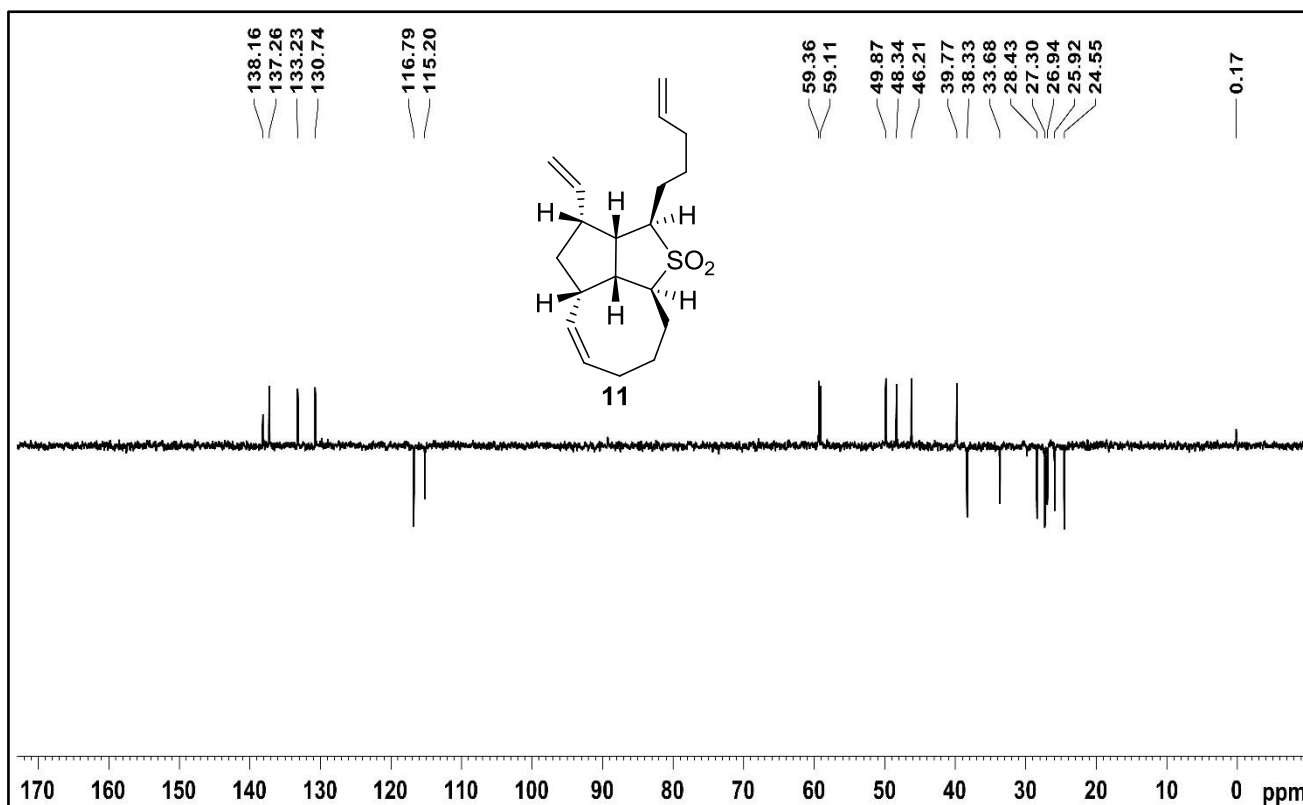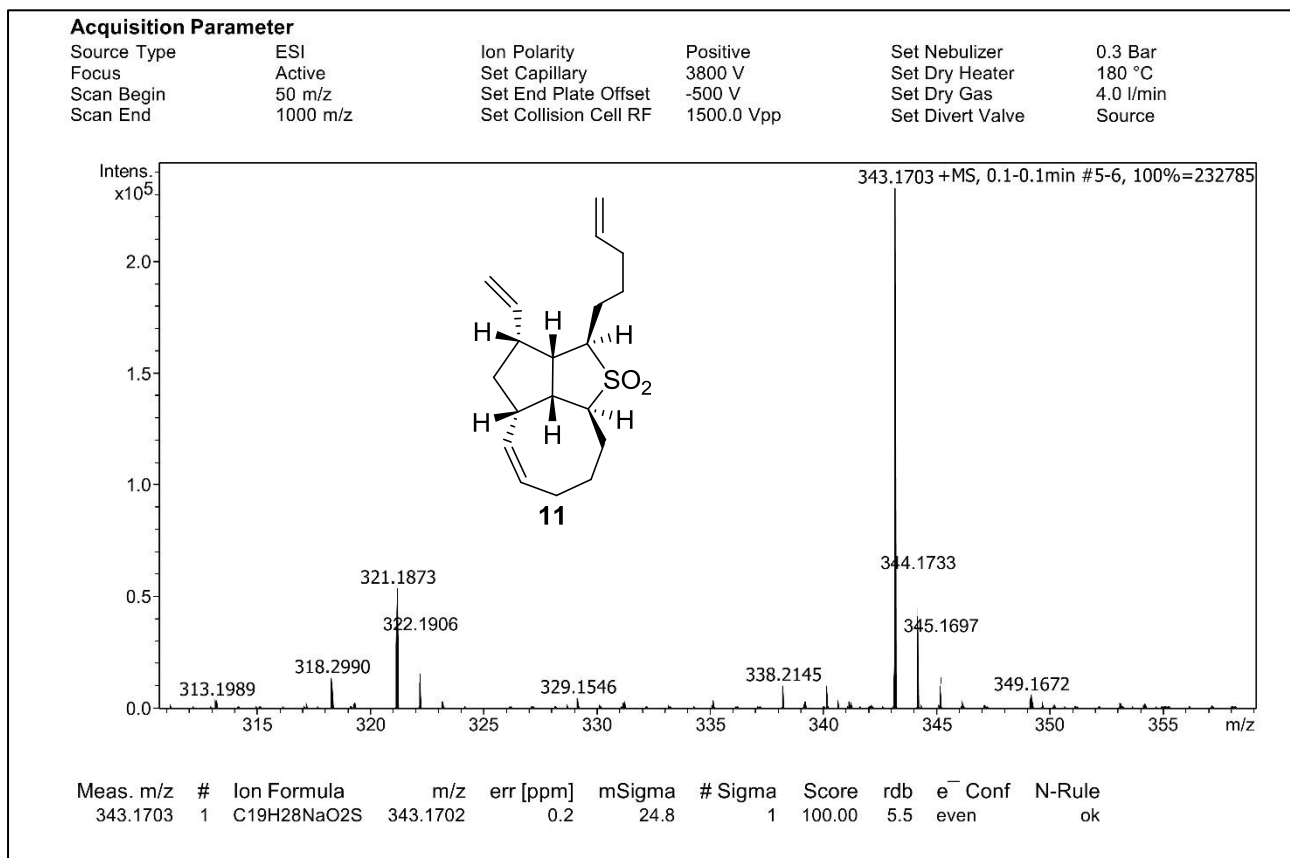

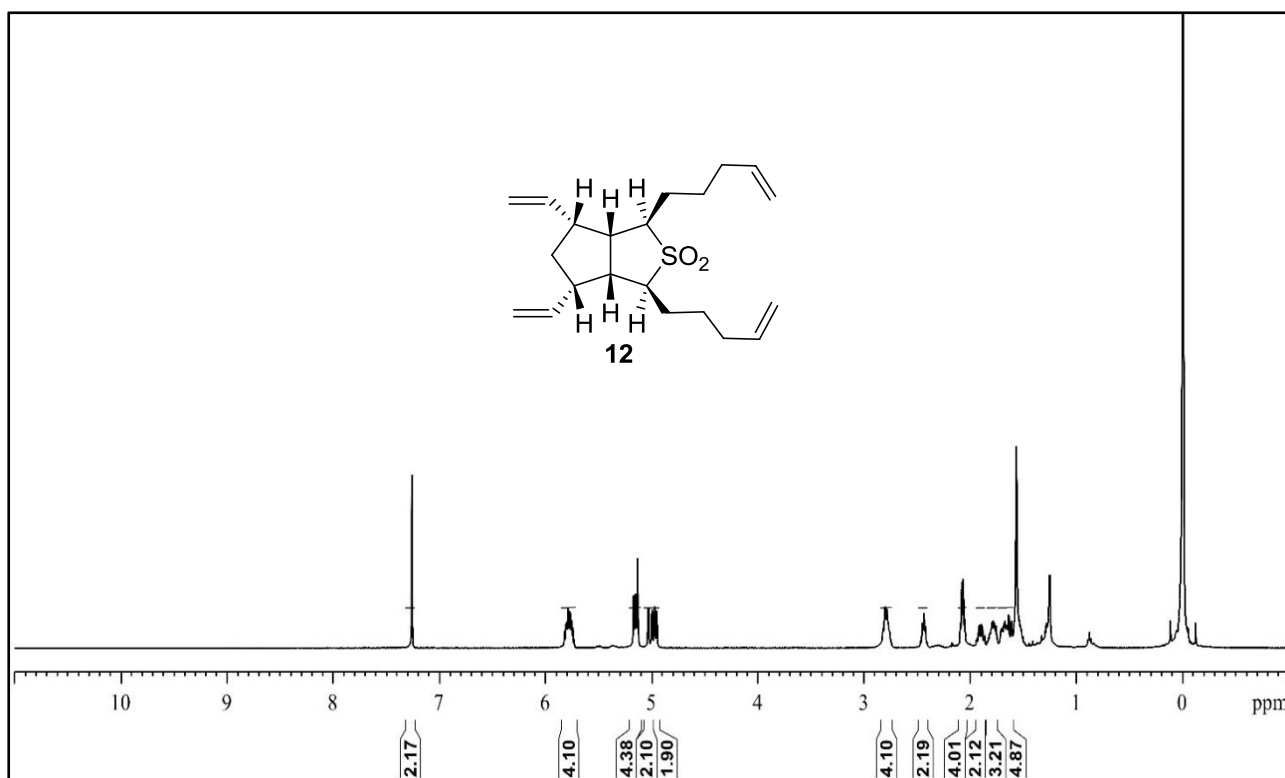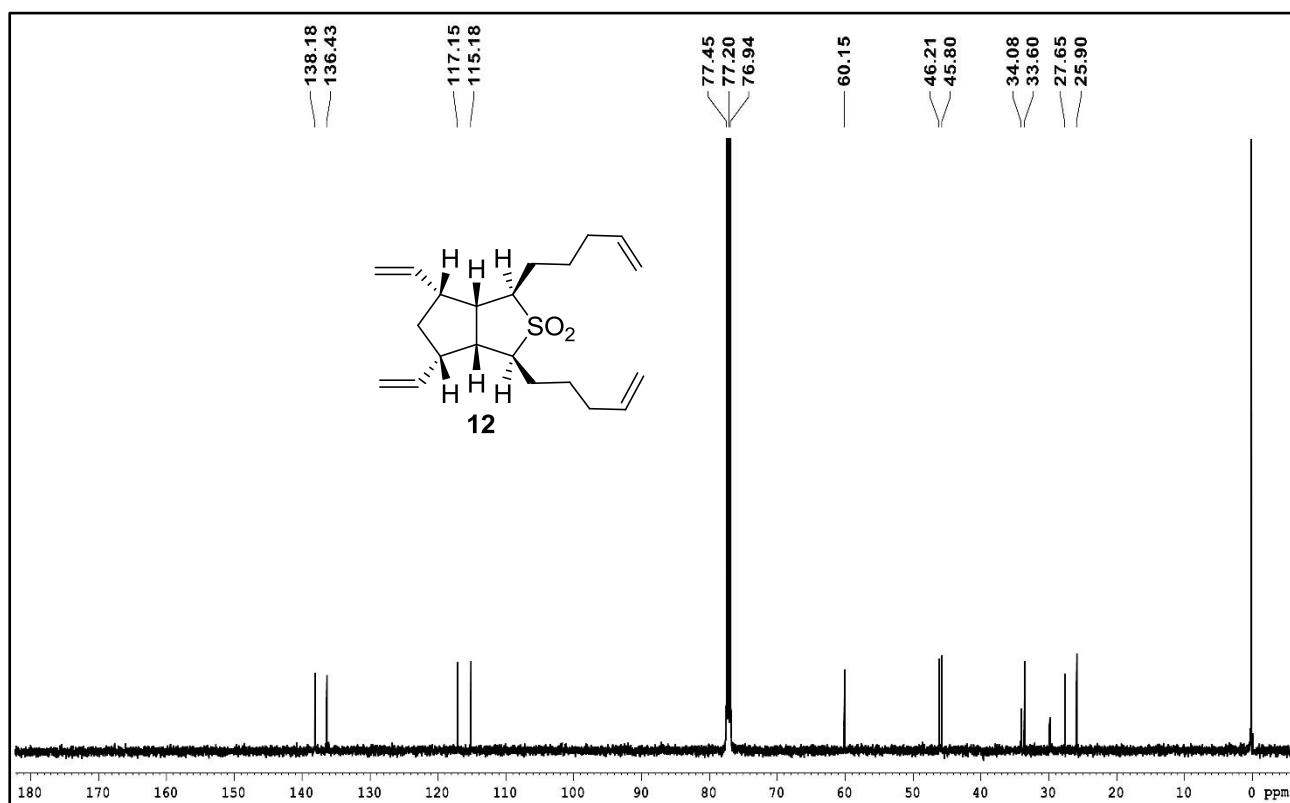

**Acquisition Parameter**

|             |          |                       |            |                  |           |
|-------------|----------|-----------------------|------------|------------------|-----------|
| Source Type | ESI      | Ion Polarity          | Positive   | Set Nebulizer    | 0.3 Bar   |
| Focus       | Active   | Set Capillary         | 3800 V     | Set Dry Heater   | 180 °C    |
| Scan Begin  | 50 m/z   | Set End Plate Offset  | -500 V     | Set Dry Gas      | 4.0 l/min |
| Scan End    | 1000 m/z | Set Collision Cell RF | 1500.0 Vpp | Set Divert Valve | Source    |

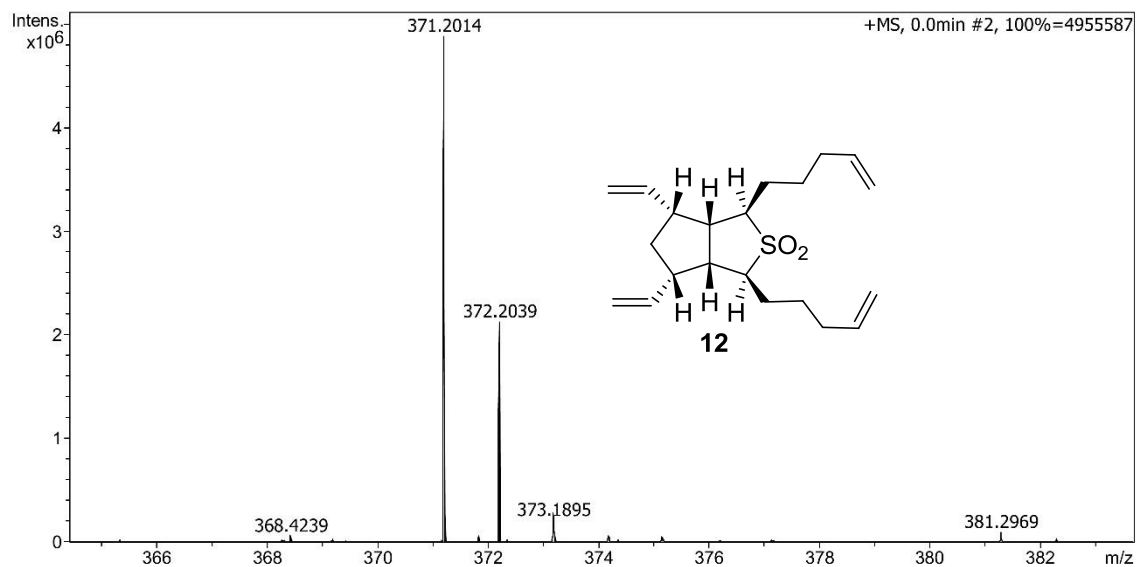

| Meas. m/z | # | Ion Formula                                        | m/z      | err [ppm] | mSigma | # Sigma | Score  | rdb | e <sup>-</sup> Conf | N-Rule |
|-----------|---|----------------------------------------------------|----------|-----------|--------|---------|--------|-----|---------------------|--------|
| 371.2014  | 1 | C <sub>21</sub> H <sub>32</sub> NaO <sub>2</sub> S | 371.2015 | 0.2       | 99.3   | 1       | 100.00 | 5.5 | even                | ok     |

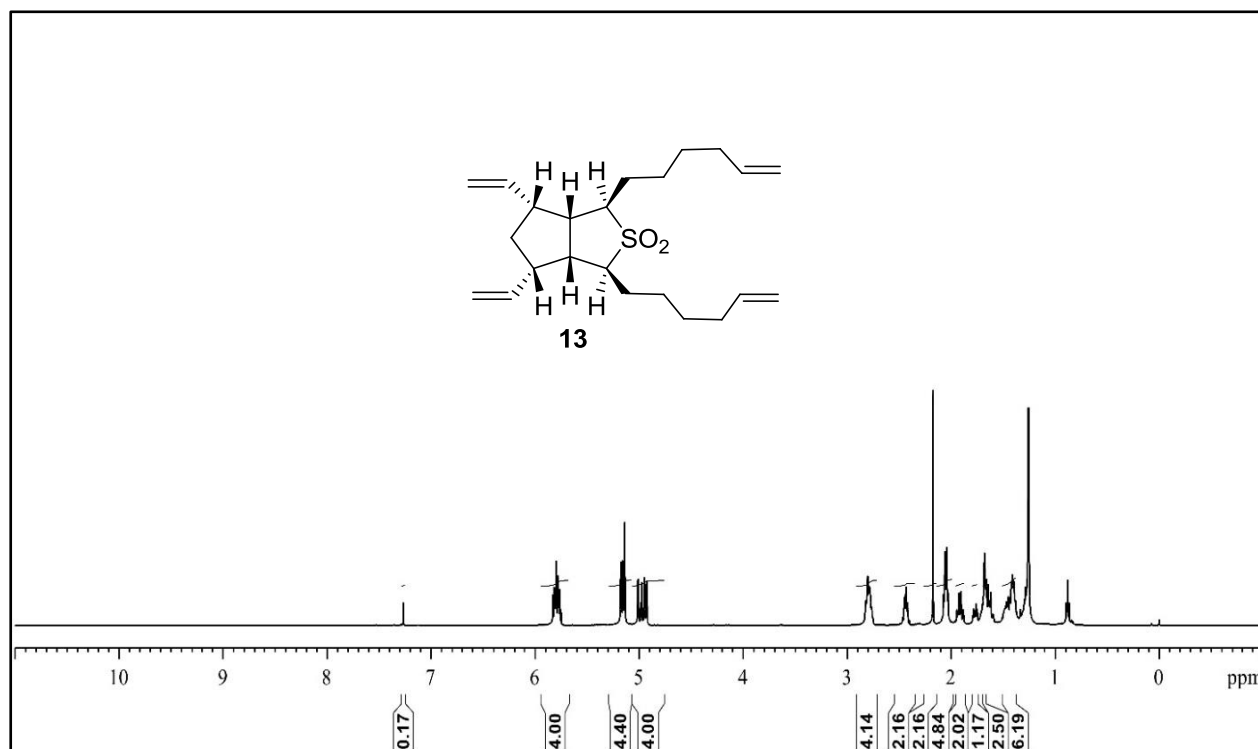

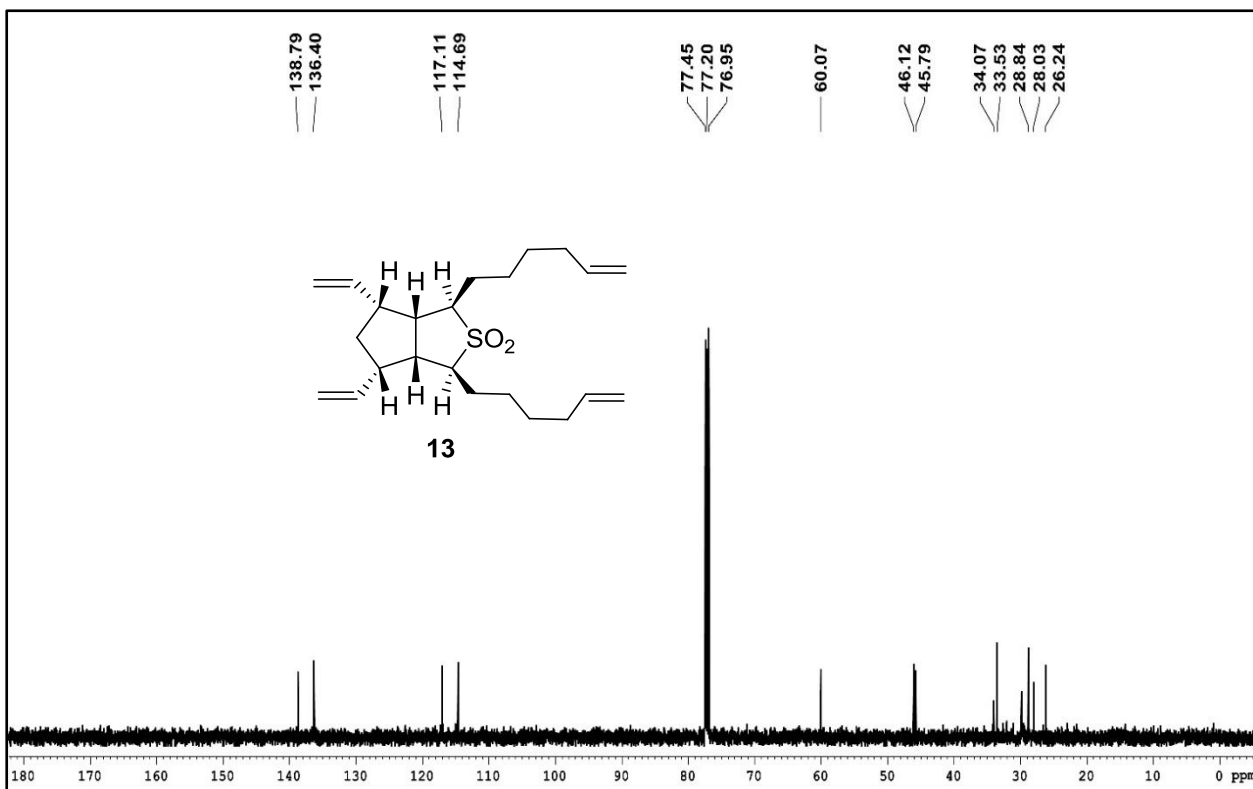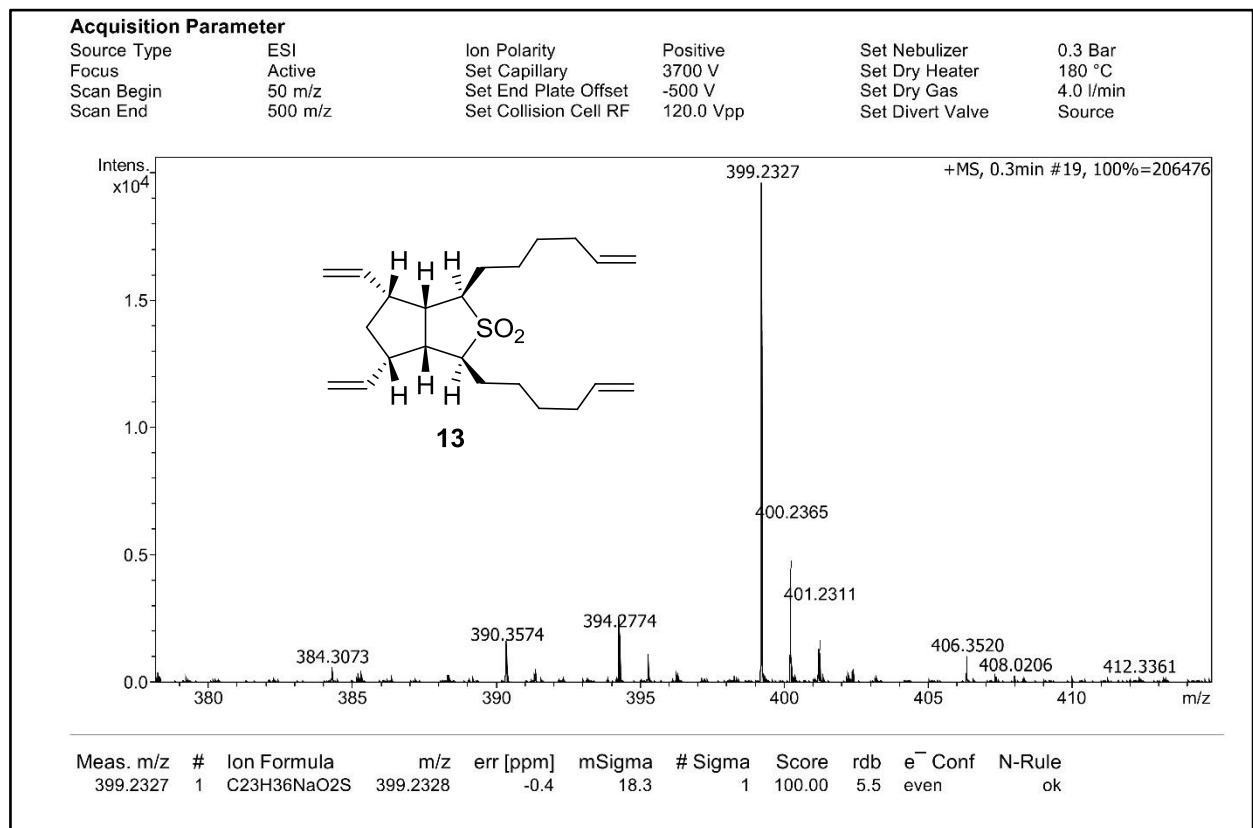

Supplement: Additional file 1 [file 1860-5397-11-148-S1.pdf]
